# Supplementary material for: Remarkably improved stability and enhanced activity of a Burkholderia cepacia lipase by coating with a triazolium alkyl-PEG sulfate ionic liquid
Source: Royal Society of Chemistry journal article supplement (doi:10.1039/c7gc02319g), 2017-01-01
Supplement: c7gc02319g1.pdf [file c7gc02319g1.pdf]

## Electronic Supplementary Information

### Enhanced activity and remarkable improved stability of a *Burkholderia cepacia* lipase by the coating with a triazolium alkylPEG sulfate ionic liquid

T. Nishihara,<sup>a</sup> A. Shiomi,<sup>a</sup> S. Kadotani,<sup>a</sup> T. Nokami,<sup>a, b</sup> T. Itoh<sup>a, b\*</sup>

<sup>a</sup>*Department of Chemistry and Biotechnology, Graduate School of Engineering, Tottori University  
4-101 Koyamacho-minami, Tottori City, 680-8552 Tottori, Japan*

<sup>b</sup>*Center for Research on Green Sustainable Chemistry, Graduate School of Engineering, Tottori University  
4-101 Koyamacho-minami, Tottori City, 680-8552 Tottori, Japan*

*E-mail: titoh@chem.tottori-u.ac.jp*

#### Contents

|                                                                                                                         |       |     |
|-------------------------------------------------------------------------------------------------------------------------|-------|-----|
| General procedure                                                                                                       | ----- | S2  |
| 1. Synthesis of ionic liquids <b>Tz1</b> , <b>Tz2</b> , and <b>Tz3</b>                                                  | ----- | S3  |
| 1-1. Synthesis of <b>Tz1</b> .                                                                                          | ----- | S3  |
| 1-2. Synthesis of <b>Tz2</b> .                                                                                          | ----- | S4  |
| 1-3. synthesis of <b>Tz3</b> .                                                                                          | ----- | S5  |
| 2. Enzymatic reaction                                                                                                   | ----- | S7  |
| 2-1. Kinetic resolution of (±)- 1-phenylethanol ( <b>1a</b> )                                                           | ----- | S6  |
| 2-1-1. Results of Triazolium IL-catalyzed reactions.                                                                    | ----- | S7  |
| 2-1-2. Results of the control experiments.                                                                              | ----- | S7  |
| 2-2. Kinetic resolution of (±)- 1-indanole( <b>1b</b> )                                                                 | ----- | S8  |
| 2-3. Kinetic resolution of (±)-1-(naphthalen-2-yl)ethan-1-ol ( <b>1c</b> )                                              | ----- | S9  |
| 2-4. Kinetic resolution of (±)-1-(naphthalen-2-yl)propan-1-ol ( <b>1d</b> )                                             | ----- | S9  |
| 2-5. Kinetic resolution of (±)-1-(naphthalen-1-yl)ethan-1-ol ( <b>1e</b> )                                              | ----- | S10 |
| 2-6. Kinetic resolution of (±)-2-chloro-1-phenylethan-1-ol ( <b>1f</b> )                                                | ----- | S10 |
| 2-7. Kinetic resolution of (±)-1-(pyridin-4-yl)ethan-1-ol ( <b>1g</b> )                                                 | ----- | S11 |
| 2-8. Kinetic resolution of (±)-1-(pyridin-3-yl)ethan-1-ol ( <b>1h</b> )                                                 | ----- | S12 |
| 2-9. Kinetic resolution of (±)-1-(pyridin-2-yl)ethan-1-ol ( <b>1i</b> )                                                 | ----- | S13 |
| 2-10. Kinetic resolution of (±)-1-(E)-4-phenylbut-3-en-2-ol ( <b>1j</b> )                                               | ----- | S13 |
| 2-11. Kinetic resolution of (±)-1-3-hydroxy-3-(thiophen-2-yl)propanenitrile ( <b>1k</b> )                               | ----- | S14 |
| 2-12. Kinetic resolution of (±)-methyl 2-hydroxy-2-phenylacetate ( <b>1l</b> )                                          | ----- | S15 |
| <b>Table S1.</b> List of retention time ( <i>t</i> <sub>R</sub> ) of alcohols in the HPLC analysis reported in Table 1. | ----- | S16 |
| <b>Table S2.</b> List of retention time ( <i>t</i> <sub>R</sub> ) of acetates in the HPLC analysis reported in Table 1. | ----- | S17 |
| 3. Determination of the Kinetic Parameters                                                                              | ----- | S18 |
| 3-1. ( <i>R</i> )- <b>1h</b> as a model substrate.                                                                      | ----- | S18 |

|                                                                                                                                         |       |            |
|-----------------------------------------------------------------------------------------------------------------------------------------|-------|------------|
| <b>Table S3.</b> Results of <b>IL1</b> -PS in <i>i</i> -Pr <sub>2</sub> O for ( <i>R</i> )- <b>1h</b> .                                 | ----- | <b>S18</b> |
| <b>Figure S1.</b> Lineweaver-Burk plots of <b>IL1</b> -PS-catalyzed reaction of ( <i>R</i> )- <b>1h</b> in <i>i</i> -Pr <sub>2</sub> O. | ----- | <b>S18</b> |
| <b>Table S4.</b> Results of <b>Tz1</b> -PS in <i>i</i> -Pr <sub>2</sub> O for ( <i>R</i> )- <b>1h</b> .                                 | ----- | <b>S18</b> |
| <b>Figure S2.</b> Lineweaver-Burk plots of <b>Tz1</b> -PS-catalyzed reaction of ( <i>R</i> )- <b>1h</b> in <i>i</i> -Pr <sub>2</sub> O. | ----- | <b>S19</b> |
| <b>Table S5.</b> Results of <b>Tz2</b> -PS in <i>i</i> -Pr <sub>2</sub> O for ( <i>R</i> )- <b>1h</b> .                                 | ----- | <b>S19</b> |
| <b>Figure S3.</b> Lineweaver-Burk plots of <b>Tz2</b> -PS-catalyzed reaction of ( <i>R</i> )- <b>1h</b> in <i>i</i> -Pr <sub>2</sub> O. | ----- | <b>S19</b> |
| <b>Table S6.</b> Results of <b>Tz3</b> -PS in <i>i</i> -Pr <sub>2</sub> O for ( <i>R</i> )- <b>1h</b> .                                 | ----- | <b>S20</b> |
| <b>Figure S4.</b> Lineweaver-Burk plots of <b>Tz3</b> -PS-catalyzed reaction of ( <i>R</i> )- <b>1h</b> in <i>i</i> -Pr <sub>2</sub> O. | ----- | <b>S20</b> |
| <b>Figure S5.</b> Recycle procedure of <b>Tz1</b> -PS                                                                                   | ----- | <b>S20</b> |
| <b>Table S7.</b> Results of recyclable use experiment of <b>Tz1</b> -PS in [N <sub>222</sub> MEM][Tf <sub>2</sub> N]                    | ----- | <b>S21</b> |
| <sup>1</sup> H NMR of <b>S9</b>                                                                                                         | ----- | <b>S22</b> |
| <sup>13</sup> C NMR of <b>S9</b>                                                                                                        | ----- | <b>S22</b> |
| <sup>1</sup> H NMR of <b>Tz1</b>                                                                                                        | ----- | <b>S23</b> |
| <sup>13</sup> C NMR of <b>Tz1</b>                                                                                                       | ----- | <b>S23</b> |
| <sup>1</sup> H NMR of <b>Tz2</b>                                                                                                        | ----- | <b>S24</b> |
| <sup>13</sup> C NMR of <b>Tz2</b>                                                                                                       | ----- | <b>S24</b> |
| <sup>1</sup> H NMR of <b>Tz3</b>                                                                                                        | ----- | <b>S25</b> |
| <sup>13</sup> C NMR of <b>Tz3</b>                                                                                                       | ----- | <b>S25</b> |
| <b>References</b>                                                                                                                       | ----- | <b>S26</b> |

---

## General Procedures

Reagents and solvents were purchased from common commercial sources and were used as received or purified by distillation over appropriate drying agents. Reactions requiring anhydrous conditions were carried out under argon with dry, freshly distilled solvents, and magnetic stirring. Reactions except the preparation of the ionic liquids were monitored by thin layer chromatography using silica gel plate and GC. Thin layer chromatography was performed with the indicated solvents and Wako gel B-5F. The <sup>1</sup>H-NMR spectra and <sup>13</sup>C-NMR spectra were recorded by a Bruker Avance III spectrometer. Chemical shifts are expressed in ppm downfield from tetramethylsilane (TMS) in CDCl<sub>3</sub> as an internal reference. IR spectra were obtained on SHIMADZU FT-IR 8000 spectrometers. High resolution mass spectra were recorded on a Thermo Fisher Scientific EXACTIVE mass spectrometer. Optical rotation was measured with a JASCO DIP-370 digital polarimeter. The rate was determined by gas chromatography analysis (Quadrex bonded fused silica methyl silicone, φ 0.25 mm × 25 m, N<sub>2</sub>). The optical purity was determined by HPLC analysis using Daicel OD, OD-H, OB, AD, or OJ-H and capillary gas chromatography (Chiraldex G-TA, φ 0.25 mm × 20 m, 100 °C, He).

## 1. Synthesis of ionic liquids Tz1, Tz2, and Tz3

### 1-1. Synthesis of Tz1.

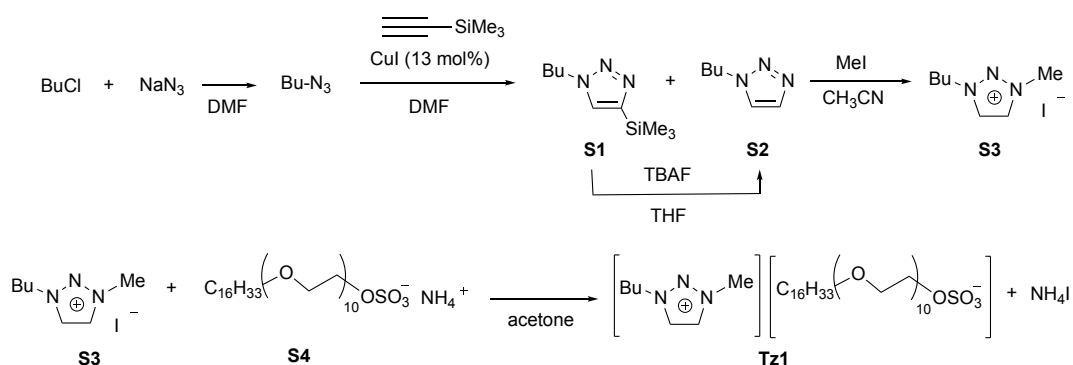

A mixture of  $\text{NaN}_3$  (2.39 g, 35.9 mmol) and 1-chlorobutane (1.33 g, 14.4 mmol) in DMF (18.5 ml) was stirred at  $80^\circ\text{C}$  for 21 h. To this mixture was added copper iodide (0.35 g, 1.84 mmol) and trimethylsilylethyne (1.74 g, 18.3 mmol), then the mixture was stirred for 72 h at the same temperature. After being cooled to rt, the precipitate was removed by filtration through a glass sintered filter, then the filtrate was dryness by evaporation. Silicagel flash column chromatography gave 1-butyl-4-(trimethylsilyl)-1,2,3-triazole **S1**<sup>[1]</sup> (1.18 g, 6.01 mmol) and 1-butyl-1,2,3-triazole **S2**<sup>[1]</sup> (0.29 g, 2.32 mmol) in 42% and 16% yield, respectively. To a THF (6.0 ml) solution of **S1** was added tributylammonium fluoride (TBAF, 9.01 mmol) and the mixture was stirred for 24 h, then evaporated to dryness to give **S2** (0.69 g, 5.51 mmol) in 92% yield. **S2** (0.69 g, 5.51 mmol) was dissolved in 2 ml of acetonitrile ( $\text{CH}_3\text{CN}$ ), then iodomethane (3.89 g, 27.6 mmol) was added at  $0^\circ\text{C}$  under dark conditions. The mixture was stirred at rt for one week, then washed with ether 3 times, then lyophilized to dryness to afford 3-butyl-1-methyl-1H-1,2,3-triazol-3-ium iodide (**S3**)<sup>[2]</sup> (1.41 g, 5.27 mmol) in 96% yield. A mixture of **S3**<sup>[2]</sup> (0.52 g, 1.87 mmol) and  $[\text{NH}_4][\text{C}_{16}\text{H}_{33}(\text{OCH}_2\text{CH}_2)_{10}\text{OSO}_3]$ <sup>[3]</sup> (1.47 g, 1.87 mmol) in 2.0 ml of acetone was stirred at rt for 24 h, then filtrated through a membrane filter to remove the precipitate ( $\text{NH}_4\text{I}$ ) formed. To the filtrate was diluted with dry acetone (10 ml) and active charcoal (2.12 g) and the mixture was stirred at  $50^\circ\text{C}$  for 2 h, then remove the active charcoal by filtration through a glass sintered filter with a Celite pad. The filtrate was dried by evaporation and subsequent lyophilization to afford **Tz1** (0.497 g, 0.55 mmol) in 30% yield.

**Tz1**: mp  $28.3^\circ\text{C}$ ;  $^1\text{H}$  NMR (600 MHz,  $\text{CDCl}_3$ ,  $J=\text{Hz}$ )  $\delta$  0.88 (3H, t,  $J=7.2$ ), 1.00 (3H, t,  $J=7.2$ ), 1.25 (30H, m), 1.46 (2H, sextet,  $J=7.2$ ), 1.60 (2H, m), 1.61 (2H, m), 3.4 (2H, t,  $J=6.6$ ), 3.58 (2H, d,  $J=5.4$ ), 3.65-3.63 (34H, m), 3.72 (2H, m), 4.25 (3H, s), 4.73 (2H, t,  $J=7.8$ ), 9.22 (1H, s), 9.44 (1H, s);  $^{13}\text{C}$  NMR (150 MHz,  $\text{CDCl}_3$ ,  $J=\text{Hz}$ )  $\delta$  13.36, 14.09, 22.64, 25.76, 26.04, 29.31, 29.45, 29.49, 29.52, 29.57, 29.60, 29.64, 31.41, 31.87, 41.12, 54.08, 61.49, 61.67, 61.70, 62.79, 69.98, 70.10, 70.13, 70.25, 70.42, 71.50, 71.71, 72.50, 72.66, 131.41, 132.29; IR (neat,  $\text{cm}^{-1}$ ) 3421, 2916, 2850, 1538, 1466, 1345, 1280, 1242, 1109, 964, 842; ESI-MS (Cation): calcd for  $\text{C}_7\text{H}_{14}\text{N}_3^+$  140.1182, found 140.1180.

**S1**:  $^1\text{H}$  NMR (600 MHz,  $\text{CDCl}_3$ ,  $J=\text{Hz}$ )  $\delta$  0.33 (9H, s), 0.96 (3H, t,  $J=7.4$ ), 1.37 (2H, m,  $J=7.4$ ), 1.89 (2H, m), 4.38 (2H, t,  $J=7.4$ ), 7.48 (1H, s);  $^{13}\text{C}$  NMR (150 MHz,  $\text{CDCl}_3$ ,  $J=\text{Hz}$ )  $\delta$  -0.9, 13.7, 20.0, 32.7, 49.7, 128.9, 146.7; IR (neat,  $\text{cm}^{-1}$ ) 3116, 2956, 2860, 2932, 1677, 1466, 1382, 1248, 1092, 1048, 1001, 839, 756, 655, 631.

**S2** <sup>[1]</sup>: <sup>1</sup>H NMR (600 MHz, CDCl<sub>3</sub>, *J*=Hz) δ 0.96 (3H, t, *J*=7.2), 1.36 (m, 2H, *J*=7.2), 1.90 (2H, m), 4.40 (2H, t, *J*=7.2), 7.55 (1H, s), 7.70 (1H, s); <sup>13</sup>C NMR (150 MHz, CDCl<sub>3</sub>, *J*=Hz) δ 13.7, 19.9, 32.5, 50.1, 123.3, 134.0; IR (neat, cm<sup>-1</sup>) 3447, 3123, 2960, 2935, 2875, 1642, 1482, 1466, 1381, 1268, 1216, 1115, 1072, 1028, 952, 787, 753, 703, 639.

**S3** <sup>[2]</sup>: <sup>1</sup>H NMR (600 MHz, CDCl<sub>3</sub>, *J*=Hz) δ 1.00 (3H, t, *J*=7.8), 1.44 (2H, m, *J*=7.2), 2.05 (2H, m), 4.54 (3H, s), 4.76 (2H, t, *J*=7.2), 9.38 (1H, s), 9.49 (1H, s); <sup>13</sup>C NMR (150 MHz, CDCl<sub>3</sub>, *J*=Hz) δ 13.4, 19.3, 31.4, 41.3, 54.1, 131.3, 132.1; IR (neat, cm<sup>-1</sup>) 3461, 3134, 3077, 2956, 2936, 2874, 1528, 1463, 1346, 1311, 1212, 1192, 1126, 1086, 807, 748, 732, 687, 651.

## 1-2. Synthesis of Tz2.

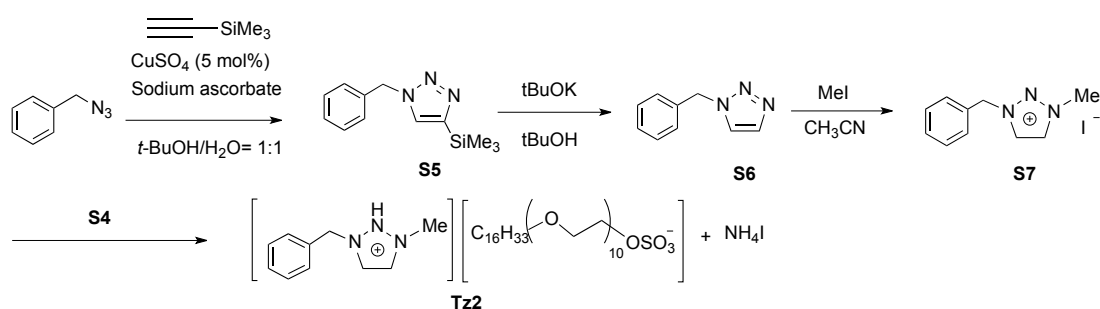

A mixture of NaN<sub>3</sub> (1.62 g, 25.0 mmol) and benzylbromide (1.82 g, 10.7 mmol) in CH<sub>3</sub>CN (25 ml) was stirred at 65°C for 24 h. After allowed to cool to rt, the mixture was diluted with ethyl acetate (20 ml) and washed with water. The organic layer was dried with anhydrous MgSO<sub>4</sub> and evaporated to dryness. To the resulting residue were added *t*-BuOH/H<sub>2</sub>O=1/1 (18 ml), CuSO<sub>4</sub> (74.0 mg, 0.46 mmol), sodium ascorbate (185.9 mg, 0.94 mmol), and trimethylsilylacetylene (933 mg, 9.50 mmol), then the mixture was stirred at rt for 17 h. The reaction was quenched by addition of saturated NH<sub>4</sub>Cl aqueous solution, then extracted with ethyl acetate. The organic layer was washed with water 3 times, then evaporated to dryness. SiO<sub>2</sub> flash column chromatography gave 1-benzyl-4-(trimethylsilyl)-1,2,3-triazole **S5** (1.620 g, 7.01 mmol) in 66% yield (2 steps) as a white solid.

To a *t*-BuOH (2.0 ml) solution of **S5** (223.3 mg, 0.97 mmol) was added *t*-BuOK (168 mg, 1.5 mmol) and the mixture was stirred at 40°C for 14 h, then the mixture was diluted water (2.0 ml) and extracted with ether 3 times. The organic layer was dried with MgSO<sub>4</sub> and evaporated to dryness, then subsequent SiO<sub>2</sub> flash column chromatography afforded 1-benzyl-1,2,3-triazole **S6**<sup>[4]</sup> (121.6 mg, 0.76 mmol) in 78% yield as a white solid.

To a **S6** (101.7 mg, 0.63 mmol) solution of 0.1 ml of acetonitrile (CH<sub>3</sub>CN) was added iodomethane (178.3 mg, 1.26 mmol) at 0°C. The mixture was stirred at rt for 2 days under dark conditions and washed with ether 3 times, then the organic layer was evaporated to dryness and subsequent lyophilization to afford 3-benzyl-1-methyl-1*H*-1,2,3-triazol-3-ium iodide (**S7**) (112 mg, 0.37 mmol) in 59% yield. A mixture of **S7** (99.7 mg, 1.87 mmol) and [NH<sub>4</sub>][C<sub>16</sub>H<sub>33</sub>(OCH<sub>2</sub>CH<sub>2</sub>)<sub>10</sub>OSO<sub>3</sub>]<sup>[3]</sup> (261.3 mg, 0.33 mmol) in 2.0 ml of acetone was stirred at rt for 24 h, then precipitate (NH<sub>4</sub>I) produced

was removed through a membrane filter and the filtrate was dried by evaporation and subsequent lyophilization to give **Tz2** (283.7 mg, 0.55 mmol) in 91% yield.

**Tz2**: mp: 29.0 °C; <sup>1</sup>H NMR(600 MHz, CDCl<sub>3</sub>, *J*=Hz) δ 9.24(s, 1H), 9.21(s, 1H), 7.59-7.57(m, 2H), 7.41(t, 3H, *J*=3.6), 5.95(s, 2H), 4.48(s, 3H), 3.74-3.57(m, 36H), 3.43(t, 2H, *J*=6.6), 1.57(t, 2H, *J*=7.2), 1.31(m, 26H), 0.88(t, 3H, *J*=7.2); <sup>13</sup>C NMR(150 MHz, CDCl<sub>3</sub>, *J*=Hz) δ 132.50, 131.32, 131.16, 130.03, 129.54, 129.51, 72.52, 71.56, 70.61, 70.54, 70.51, 70.46, 70.26, 70.18, 70.04, 69.87, 68.86, 66.34, 61.57, 57.52, 41.00, 31.92, 29.70, 29.65, 29.63, 29.51, 29.36, 26.10, 22.69, 14.12; IR(neat, cm<sup>-1</sup>) 3922.48, 3149.64, 3075.42, 3044.15, 2991.81, 2917.26, 281.04, 1774.84, 1529.57, 1494.27, 1455.32, 1385.77, 1345.32, 1301.16, 1282.12, 1215.74, 1173.44, 1114.49, 1090.39, 1029.65, 950.03, 913.82, 827.69, 791.18, 720.39, 693.46, 577.66; ESI-MS: calcd for C<sub>10</sub>H<sub>12</sub>N<sub>3</sub><sup>+</sup>174.1026, found 174.1024

**S5**: <sup>1</sup>H NMR(600MHz, MeOD, *J*=Hz): δ 7.88(s, 1H), 7.27-7.21(m, 5H), 5.2(s, 2H), 0.20(s, 1H); <sup>13</sup>C NMR(150 MHz, CDCl<sub>3</sub>, *J*=Hz): δ 148.21, 136.10, 130.16, 129.86, 129.69, 129.18, 54.65, -0.04; IR(neat, cm<sup>-1</sup>) 3106.29, 3026.32, 2957.55, 2901.92, 1884.20, 149.42, 1484.22, 1458.54, 1448.95, 1415.97, 1354.82, 1322.12, 1246.28, 1193.17, 1153.38, 1099.55, 1075.69, 1053.47, 1028.95, 1001.12, 947.49, 840.35, 763.62, 722.69, 695.82, 651.57, 635.43, 584.50, 473.52, 406.40.

**S6**<sup>[4]</sup>: <sup>1</sup>H NMR (600 MHz, CDCl<sub>3</sub>, *J*=Hz) δ 8.00 (s, 1H), 7.76 (s, 1H), 7.41-7.34 (m, 5H), 4.94 (s, 2H); <sup>13</sup>C NMR (150 MHz, CDCl<sub>3</sub>, *J*=Hz) δ 134.71, 134.26, 129.13, 128.75, 123.02, 123.26, 53.99; IR (neat, cm<sup>-1</sup>) 3136.70, 3107.65, 3064.95, 3026.49, 2974.70, 2942.66, 2703.01, 2418.95, 2304.10, 2112.10, 1957.13, 1869.75, 1810.34, 1754.79, 1686.44, 1606.93, 1496.27, 1464.41, 1454.53, 1438.61, 1371.11, 1337.73, 1307.90, 1285.70, 1216.55, 1160.43, 1113.82, 1085.03, 1075.20, 1030.94, 967.42, 951.23, 898.40, 812.36, 773.80, 724.44, 693.01, 573.82, 457.01

**S7**: <sup>1</sup>H NMR(600 MHz, CDCl<sub>3</sub>, *J*=Hz) δ 9.40(s, 1H), 9.32(s, 1H), 7.60-7.59(m, 2H), 7.43(t, 3H, *J*=3.0), 5.97(s, 2H), 4.51(s, 3H); <sup>13</sup>C NMR(150 MHz, CDCl<sub>3</sub>, *J*=Hz) δ 132.41, 131.16, 131.05, 130.13, 129.59, 129.54, 57.50, 41.19; IR(neat, cm<sup>-1</sup>) 3922.41, 3149.07, 3075.56, 3044.16, 2992.05, 2966.63, 2938.61, 2876.43, 2124.81, 1949.31, 1774.32, 1529.26, 1494.18, 1455.04, 1385.67, 1319.13, 1301.15, 1282.61, 1215.34, 1173.41, 1152.63, 1089.47, 1029.40, 791.30, 719.94, 693.30, 577.54.

### 1-3. synthesis of Tz3.

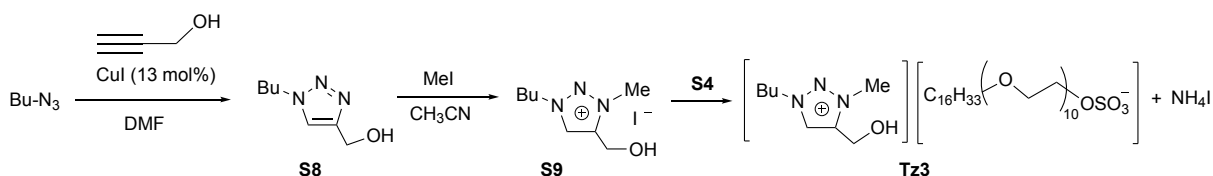

A mixture of NaN<sub>3</sub> (2.40 g, 36.9 mol) and 1-bromobutane (2.03 g, 14.8 mmol) in DMF (18 ml) was stirred at 80°C for 16 h, then allowed to cool to rt. To the mixture was added CuI (359.2 mg, 1.89 mmol) and propargyl alcohol (1.115 g, 19.9 mmol), and the mixture was stirred at 80°C for 18 h. After allowed to cool to rt, the precipitate formed was removed by filtration through glass sintered

filter and the filtrate was evaporated and subsequent SiO<sub>2</sub> column chromatography to give (1-butyl-1,2,3-triazol-4-yl)methanol (**S8**) (1.024 g, 6.77 mmol) in 46% yield.

Reaction of **S8** (780.1 mg, 5.03 mmol) with iodomethane (1.464 g, 10.3 mmol) for 3 days under dark conditions gave **S9** (1.394 g, 4.72 mmol) in 94% yield.

A mixture of [NH<sub>4</sub>][C<sub>16</sub>H<sub>33</sub>(OCH<sub>2</sub>CH<sub>2</sub>)<sub>10</sub>OSO<sub>3</sub>]<sup>[3]</sup> (779.7 mg, 1.00 mmol) and 1-butyl-4-(hydroxymethyl)-3-methyl-1*H*-1,2,3-triazolium iodide (**S9**) (296.7 mg, 1.00 mmol) in acetone (5.0 ml) was stirred at rt for 24 h, then NH<sub>4</sub>I precipitated was removed by filtration through a membrane filter. The filtrate was evaporated to dryness and subsequent lyophilization to afford **Tz3** (923.6 mg) in 99% yield.

**Tz3**: mp 25.0°C; <sup>1</sup>H NMR(600 MHz, CDCl<sub>3</sub>, *J*=Hz) δ 8.80(s, 1H), 4.99(s, 2H), 4.58(t, 2H, *J*=7.2), 4.37(s, 3H), 3.75-3.58(m, 38H), 3.44(t, 2H, *J*=6.6), 2.03(m, 2H), 1.58-1.56(m, 2H), 1.47-1.25(m, 26H), 1.00(t, 3H, *J*=7.2), 0.88(t, 3H, *J*=7.2); <sup>13</sup>C NMR(150 MHz, CDCl<sub>3</sub>, *J*=Hz) δ 143.95, 129.95, 72.3, 71.57, 70.37, 70.10, 70.01, 61.42, 53.99, 52.71, 39.10, 31.94, 31.22, 29.71, 29.68, 29.64, 29.52, 29.38, 26.10, 22.71, 19.48, 14.16; IR(neat, cm<sup>-1</sup>) 3236.72, 2923.16, 2854.40, 2114.50, 1465.96, 1349.20, 1301.97, 1251.88, 1115.11, 952.20; ESI-MS: calcd for C<sub>8</sub>H<sub>16</sub>N<sub>3</sub>O<sup>+</sup>170.1288, found 170.1287.

**S8**: <sup>1</sup>H NMR(600 MHz, CDCl<sub>3</sub>, *J*=Hz) δ 7.56(s, 1H), 4.78(s, 2H), 4.34(t, 2H, *J*=7.2), 1.90-1.85(m, 2H), 1.38-1.26(m, 2H), 0.95(t, 3H, *J*=7.2); <sup>13</sup>C NMR(150 MHz, CDCl<sub>3</sub>, *J*=Hz) δ 147.83, 121.64, 56.15, 50.07, 32.20, 19.66, 13.41; IR(neat, cm<sup>-1</sup>) 3332.02, 3139.57, 2959.70, 2934.83, 2874.04, 1463.15, 1437.93, 1380.94, 1336.93, 1221.28, 1144.61, 1050.36, 1013.79, 772.45, 655.51.

**S9**: <sup>1</sup>H NMR(600 MHz, CDCl<sub>3</sub>, *J*=Hz) δ 9.02(s, 1H), 5.03(s, 2H), 4.87(s, 1H), 4.65(t, 2H, *J*=7.2), 4.39(s, 3H), 2.05-2.00(m, 2H), 1.47-1.41(m, 2H), 0.99(t, 3H, *J*=7.2); <sup>13</sup>C NMR(150 MHz, CDCl<sub>3</sub>, *J*=Hz) δ 143.56, 129.75, 54.04, 52.63, 39.76, 31.22, 19.39, 13.39; IR(neat, cm<sup>-1</sup>) 3288.44, 3076.94, 2958.96, 2935.38, 2872.89, 1583.84, 1459.12, 1381.21, 1317.49, 1236.78, 1160.85, 1124.86, 1078.67, 1040.50, 809.14, 637.21, 531.80; ESI-MS: calcd for C<sub>8</sub>H<sub>16</sub>N<sub>3</sub>O<sup>+</sup>170.1288, found 170.1276.

## 2. Enzymatic reaction

### 2-1. Kinetic resolution of (±)- 1-phenylethanol (1a).

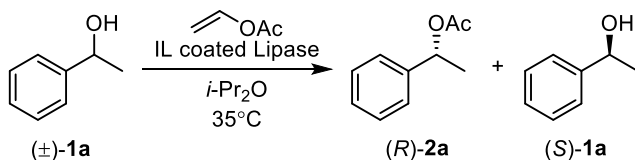

#### 2-1-1. Results of Triazolium IL-catalyzed reactions.

##### Tz1-PS catalyzed reaction:

A mixture of (±)-**1a** (50.3 mg, 0.41 mmol), vinyl acetate (54.5 mg, 0.63 mmol), and **Tz1-PS** (5.3 mg) in *i*-Pr<sub>2</sub>O (2.0 ml) was stirred at 35°C for 40 min. The reaction was quenched by addition of 1.0 ml of ethyl acetate and removed the enzyme by filtration through a glass sintered filter with a Celite pad, then silica gel thin layer chromatography (TLC) (hexane/ ethyl acetate= 4:1) gave (*R*)-**2a** and (*S*)-**1a**.

The reaction rate of the lipase-catalyzed reaction was determined by capillary GC-analysis (Quadrex bonded fused silica methyl silicone,  $\phi$  0.25 mm  $\times$  25 m, He) in the presence of an internal reference. The enantioselectivity was determined by HPLC analysis using a chiral column (Chiralcel OB, hexane: 2-propanol = 8 : 1, 200 : 1).

(*R*)-**2a**: 21.9 mg, 0.133 mmol, Y= 32.6 %, >99 % *ee*,  $[\alpha]_D^{24}$  +119.1 (c 1.08, CHCl<sub>3</sub>)

(*S*)-**1a**: 24.3 mg, 0.199 mmol, Y= 48.5 %, 71.0 % *ee*,  $[\alpha]_D^{19}$  -19.6 (c 1.02, CHCl<sub>3</sub>)

Conv. 41.5%, *E* value >200 (4271), Rate: 595.6 mM h<sup>-1</sup> mg enzyme<sup>-1</sup>

#### **Tz2-PS catalyzed reaction:**

(*R*)-**2a**: 10.8 mg, 0.0658 mmol, Y= 16.0 %, >99 % *ee*,  $[\alpha]_D^{24}$  +113.8 (c 1.13, CHCl<sub>3</sub>)

(*S*)-**1a**: 19.3 mg, 0.158 mmol, Y= 38.5 %, 75.6 % *ee*,  $[\alpha]_D^{24}$  -159.1 (c 0.93, CHCl<sub>3</sub>)

Conv. 43.1%, *E* value >200 (4582), Rate: 630.7 mM h<sup>-1</sup> mg enzyme<sup>-1</sup>

#### **Tz3-PS catalyzed reaction:**

(*R*)-**2a**: 23.8 mg, 0.145 mmol, Y= 35.3 %, >99 % *ee*,  $[\alpha]_D^{27}$  +86.9 (c 0.99, CHCl<sub>3</sub>)

(*S*)-**1a**: 22.9 mg, 0.188 mmol, Y= 45.7 %, 83.4 % *ee*,  $[\alpha]_D^{28}$  -12.6 (c 1.08, CHCl<sub>3</sub>)

Conv. 45.5%, *E* value >200 (5280), Rate: 501.7 mM h<sup>-1</sup> mg enzyme<sup>-1</sup>

### **2.1-2. Results of the control experiments.**

#### **Commercial Lipase-PS catalyzed reaction:**

To a solution of ( $\pm$ )-**1a** (50.0 mg, 0.41 mmol), vinyl acetate (53.0 mg, 0.62 mmol) in *i*-Pr<sub>2</sub>O (2.0 mL) was added Lipase PS (25 mg, Enzyme content: 0.25 mg) and the mixture was stirred at 35 °C for 8 h. The reaction rate of the lipase-catalyzed reaction was determined by capillary GC-analysis. (*R*)-**2a** and (*S*)-**3a** were obtained by preparative silica gel thin layer chromatography (TLC).

(*R*)-**2a**: 30.9 mg, 0.19 mmol, Y= 46.0 %, >99 % *ee*

(*S*)-**1a**: 18.0 mg, 0.15 mmol, Y= 36 %, 88 % *ee*

Conv. 47.0%, *E* value >200 (584), Rate: 90 mM h<sup>-1</sup> mg enzyme<sup>-1</sup>

#### **Celite free Lipase PS catalyzed reaction:**

Commercial lipase PS (1.00 g, enzyme protein 10 mg;  $3.1 \times 10^{-4}$  mmol) was dissolved in 10 ml of 0.1 M phosphate buffer (pH 7.2) and the mixture was centrifuged twice at 3,500 rpm for 5 min, then the resulting supernatant was lyophilized to afford the Celite-free lipase PS (224 mg). The estimated amount of the lipase protein in this Celite-free lipase PS powder was 4.5 % (w/w).

To a solution of ( $\pm$ )-**1a** (50.2 mg, 0.41 mmol), vinyl acetate (52.9 mg, 0.62 mmol) in *i*-Pr<sub>2</sub>O (2.0 mL) was added the Celite free Lipase PS (4.5 mg, enzyme content: 0.20 mg) and the mixture was stirred at 35 °C for 8 h. The reaction rate of the lipase-catalyzed reaction was determined by capillary GC-analysis. (*R*)-**2a** and (*S*)-**3a** were obtained by preparative silica gel thin layer chromatography (TLC).

(*R*)-**2a**: 26.9 mg, 0.16 mmol, Y= 40.0 %, >99 % *ee*

(*S*)-**1a**: 19.5 mg, 0.16 mmol, Y= 39 %, 86 % *ee*

Conv. 46.0%, *E* value >200 (556), Rate: 84 mM h<sup>-1</sup> mg enzyme<sup>-1</sup>

#### **IL1-PS catalyzed reaction:**

To a solution of ( $\pm$ )-**1a** (50.1 mg, 0.41 mmol) and vinyl acetate (52.9 mg, 0.62 mmol) in *i*-Pr<sub>2</sub>O (2.0 mL) was added **IL1-PS** (7.0 mg, the enzyme content: 0.20 mg) and the mixture was stirred at 35°C for 30 min. (*R*)-**2a** and (*S*)-**3a** were obtained by preparative silica gel thin layer chromatography (TLC).

(*R*)-**2a**: 18.1 mg, 0.11 mmol, Y= 27.0 %, >99 % *ee*

(*S*)-**1a**: 20.0 mg, 0.16 mmol, Y= 39 %, 77 % *ee*

Conv. 43.0%, *E* value >200 (*E* 466), Rate: 884 mM h<sup>-1</sup> mg enzyme<sup>-1</sup>

## 2-2. Kinetic resolution of ( $\pm$ )-1-indanole(**1b**).

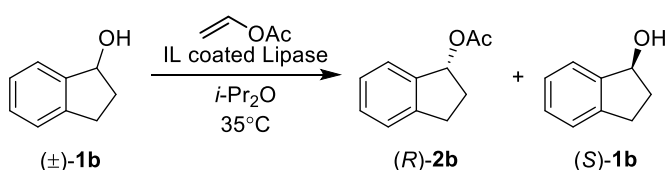

### Tz1-PS catalyzed acetylation:

A mixture of ( $\pm$ )-**1b** (53.6 mg, 0.40 mmol), vinyl acetate (52.2 mg, 0.61 mmol), and **Tz1-PS** (5.4 mg) in *i*-Pr<sub>2</sub>O (2.0 ml) was stirred at 35°C for 40 min. The reaction was quenched by addition of 1.0 ml of ethyl acetate and the enzyme was removed by filtration through a glass sintered filter with a Celite pad, then silica gel TLC (hexane/ ethyl acetate= 4:1) gave (*R*)-**2b** and (*S*)-**1b**.

(*R*)-**2b**: 21.6 mg, 0.123 mmol, Y= 30.7 %, >99 % *ee*, [ $\alpha$ ]<sub>D</sub><sup>28</sup> +9.16 (c 0.62, CHCl<sub>3</sub>)

(*S*)-**1b**: 14.6 mg, 0.109 mmol, Y= 27.2 %, >99 % *ee*, [ $\alpha$ ]<sub>D</sub><sup>27</sup> +4.62 (c 0.91, CHCl<sub>3</sub>)

Conv. 50.0%, *E* value >200 (15198), Rate: 577.0 mM h<sup>-1</sup> mg enzyme<sup>-1</sup>

### Tz2-PS catalyzed acetylation:

(*R*)-**2b**: 32.7 mg, 0.1856 mmol, Y= 46.4 %, >99 % *ee*, [ $\alpha$ ]<sub>D</sub><sup>28</sup> +67.5 (c 1.04, CHCl<sub>3</sub>)

(*S*)-**1b**: 24.7 mg, 0.1841 mmol, Y= 46.0 %, 44.9 % *ee*, [ $\alpha$ ]<sub>D</sub><sup>28</sup> +26.8 (c 1.11, CHCl<sub>3</sub>)

Conv. 44.9%, *E* value >200(5082), Rate: 828.3 mM h<sup>-1</sup> mg enzyme<sup>-1</sup>

### Tz3-PS catalyzed acetylation:

(*R*)-**2b**: 35.3 mg, 0.200 mmol, Y= 50.1 %, >99 % *ee*, [ $\alpha$ ]<sub>D</sub><sup>25</sup> +88.8 (c 1.55, CHCl<sub>3</sub>)

(*S*)-**1b**: 26.3 mg, 0.196 mmol, Y= 49.0 %, >99 % *ee*, [ $\alpha$ ]<sub>D</sub><sup>25</sup> +24.5 (c 1.15, CHCl<sub>3</sub>)

Conv. 50.0%, *E* value >200(15198), Rate: 984.4 mM h<sup>-1</sup> mg enzyme<sup>-1</sup>

## 2-3. Kinetic resolution of ( $\pm$ )-1-(naphthalen-2-yl)ethan-1-ol (**1c**).

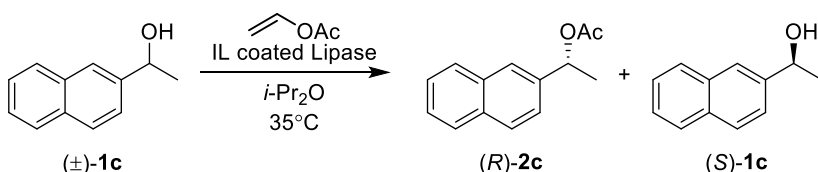

### Tz1-PS catalyzed acetylation:

A mixture of ( $\pm$ )-**1c** (68.7 mg, 0.40 mmol), vinyl acetate (53.8 mg, 0.62 mmol), and **Tz1-PS** (6.8 mg) in *i*-Pr<sub>2</sub>O (2.0 ml) was stirred at 35°C for 40 min. The reaction was quenched by addition of 1.0 ml



of ethyl acetate and the enzyme was removed by filtration through a glass sintered filter with a Celite pad, then silica gel TLC (hexane/ ethyl acetate= 7:1) gave (*R*)-**2c** and (*S*)-**1c**.

(*R*)-**2c**: 39.9 mg, 0.186 mmol, Y= 46.6%, >99% *ee*,  $[\alpha]_{\text{D}}^{28} +8.49$  (c 1.20, CHCl<sub>3</sub>)

(*S*)-**1c**: 28.6 mg, 0.166 mmol, Y= 41.5%, 91.7% *ee*,  $[\alpha]_{\text{D}}^{29} -15.4$  (c 1.04, CHCl<sub>3</sub>)

Conv. 47.9%, *E* value >200 (6560), Rate: 365.5 mM h<sup>-1</sup> mg enzyme<sup>-1</sup>

#### Tz2-PS catalyzed acetylation:

(*R*)-**2c**: 21.2 mg, 0.0989 mmol, Y= 24.7%, >99% *ee*,  $[\alpha]_{\text{D}}^{24} +89.6$  (c 1.86, CHCl<sub>3</sub>)

(*S*)-**1c**: 54.0 mg, 0.314 mmol, Y= 78.4%, 28.6% *ee*,  $[\alpha]_{\text{D}}^{25} -15.7$  (c 1.54, CHCl<sub>3</sub>)

Conv. 22.3%, *E* value >200(660), Rate: 338.3 mM h<sup>-1</sup> mg enzyme<sup>-1</sup>

#### Tz3-PS catalyzed acetylation:

(*R*)-**2c**: 15.1 mg, 0.0705 mmol, Y= 17.6%, >99% *ee*,  $[\alpha]_{\text{D}}^{27} +110.3$  (c 1.42, CHCl<sub>3</sub>)

(*S*)-**1c**: 52.5 mg, 0.305 mmol, Y= 76.2%, 22.6% *ee*,  $[\alpha]_{\text{D}}^{19} -16.8$  (c 1.31, CHCl<sub>3</sub>)

Conv. 18.5%, *E* value >200 (498), Rate: 300.1 mM h<sup>-1</sup> mg enzyme<sup>-1</sup>

### 2-4. Kinetic resolution of (±)-1-(naphthalen-2-yl)propan-1-ol (**1d**).

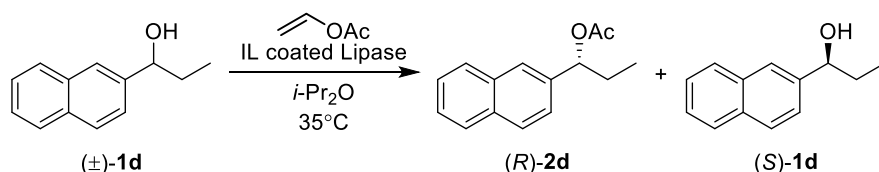

#### Tz1-PS catalyzed acetylation:

A mixture of (±)-**1d** (74.6 mg, 0.40 mmol), vinyl acetate (57.3 mg, 0.62 mmol), and **Tz1-PS** (7.8 mg) in *i*-Pr<sub>2</sub>O (2.0 ml) was stirred at 35°C for 40 min. The reaction was quenched by addition of 1.0 ml of ethyl acetate and the enzyme was removed by filtration through a glass sintered filter with a Celite pad, then silica gel TLC (hexane/ ethyl acetate= 7:1) gave (*R*)-**2d** and (*S*)-**1d**.

(*R*)-**2d**: 39.9 mg, 0.0898 mmol, Y= 22.4%, >99% *ee*,  $[\alpha]_{\text{D}}^{29} +6.85$  (c 1.49, CHCl<sub>3</sub>)

(*S*)-**1d**: 53.4 mg, 0.234 mmol, Y= 58.5%, 64.2% *ee*,  $[\alpha]_{\text{D}}^{29} -2.54$  (c 4.25, CHCl<sub>3</sub>)

Conv. 39.1%, *E* value >200 (3898), Rate: 37.2 mM h<sup>-1</sup> mg enzyme<sup>-1</sup>

#### Tz2-PS catalyzed acetylation:

(*R*)-**2d**: 23.7 mg, 0.104 mmol, Y= 26.0%, >99% *ee*,  $[\alpha]_{\text{D}}^{27} +72.8$  (c 0.81, CHCl<sub>3</sub>)

(*S*)-**1d**: 51.4 mg, 0.276 mmol, Y= 69.0%, 32.7% *ee*,  $[\alpha]_{\text{D}}^{27} -1.41$  (c 1.11, CHCl<sub>3</sub>)

Conv. 24.7%, *E* value >200 (2754), Rate: 32.6 mM h<sup>-1</sup> mg enzyme<sup>-1</sup>

#### Tz3-PS catalyzed acetylation:

(*R*)-**2d**: 17.8 mg, 0.0780 mmol, Y= 19.5%, >99% *ee*,  $[\alpha]_{\text{D}}^{26} +84.5$  (c 1.70, CHCl<sub>3</sub>)

(*S*)-**1d**: 56.1 mg, 0.301 mmol, Y= 75.3%, 21.7% *ee*,  $[\alpha]_{\text{D}}^{26} -19.5$  (c 1.13, CHCl<sub>3</sub>)

Conv. 47.9%, *E* value >200 (6560), Rate: 365.5 mM h<sup>-1</sup> mg enzyme<sup>-1</sup>

### 2-5. Kinetic resolution of (±)-1-(naphthalen-1-yl)ethan-1-ol (**1e**).

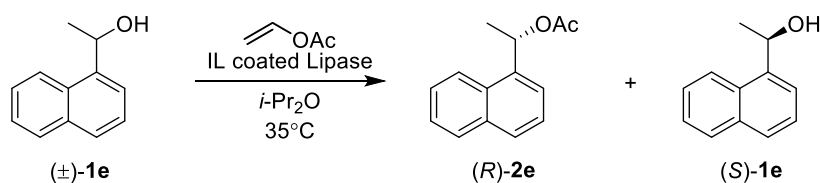

### Tz1-PS catalyzed acetylation:

A mixture of  $(\pm)\text{-1e}$  (68.9 mg, 0.40 mmol), vinyl acetate (56.7 mg, 0.66 mmol), and **Tz1-PS** (6.9 mg) in  $i\text{-Pr}_2\text{O}$  (2.0 ml) was stirred at  $35^\circ\text{C}$  for 40 min. The reaction was quenched by addition of 1.0 ml of ethyl acetate and the enzyme was removed by filtration through a glass sintered filter with a Celite pad, then silica gel TLC (hexane/ ethyl acetate= 4:1) gave  $(\text{R})\text{-2e}$  and  $(\text{S})\text{-1e}$ .

$(\text{R})\text{-2e}$ : 4.3 mg, 0.0201 mmol, Y= 5.0%, >99% *ee*,  $[\alpha]_{\text{D}}^{26} +4.00$  (c 0.35,  $\text{CHCl}_3$ )

$(\text{S})\text{-1e}$ : 59.6 mg, 0.346 mmol, Y= 86.5%, 3.5% *ee*,  $[\alpha]_{\text{D}}^{26} -1.31$  (c 1.07,  $\text{CHCl}_3$ )

Conv. 3.4%, *E* value >200 (2070), Rate: 2.2  $\text{mM h}^{-1} \text{mg enzyme}^{-1}$

### Tz2-PS catalyzed acetylation:

$(\text{R})\text{-2e}$ : 7.7 mg, 0.0359 mmol, Y= 9.0%, >99% *ee*,  $[\alpha]_{\text{D}}^{25} +45.07$  (c 0.75,  $\text{CHCl}_3$ )

$(\text{S})\text{-1e}$ : 65.0 mg, 0.377 mmol, Y= 94.4%, 7.6% *ee*,  $[\alpha]_{\text{D}}^{25} -6.67$  (c 1.29,  $\text{CHCl}_3$ )

Conv. 7.1%, *E* value >200 (2155), Rate: 8.8  $\text{mM h}^{-1} \text{mg enzyme}^{-1}$

### Tz3-PS catalyzed acetylation:

$(\text{R})\text{-2e}$ : 18.1 mg, 0.0845 mmol, Y= 21.1%, 97.6% *ee*,  $[\alpha]_{\text{D}}^{26} +49.5$  (c 1.48,  $\text{CHCl}_3$ )

$(\text{S})\text{-1e}$ : 49.3 mg, 0.286 mmol, Y= 71.6%, 24.5% *ee*,  $[\alpha]_{\text{D}}^{26} -16.5$  (c 1.33,  $\text{CHCl}_3$ )

Conv. 20.1%, *E* value 105, Rate: 13.0  $\text{mM h}^{-1} \text{mg enzyme}^{-1}$

## 2-6. Kinetic resolution of $(\pm)\text{-2-chloro-1-phenylethan-1-ol (1f)}$ .

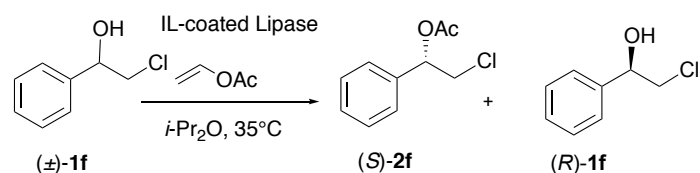

### Lipase PS-catalyzed reaction:

A mixture of  $(\pm)\text{-1f}$  (62.2 mg, 0.40 mmol), vinyl acetate (54.4 mg, 0.63 mmol), and **lipase PS** (33.0 mg) in  $i\text{-Pr}_2\text{O}$  (2.0 ml) was stirred at  $35^\circ\text{C}$  for 40 min. The reaction was quenched by addition of 1.0 ml of ethyl acetate and the enzyme was removed by filtration through a glass sintered filter with a Celite pad, then silica gel TLC (hexane/ ethyl acetate= 4:1) gave  $(\text{S})\text{-2f}$  and  $(\text{R})\text{-1f}$ . The produced acetate **2f** was assigned to be as  $(\text{S})$ -form and the unreacted alcohol **1f** was to be  $(\text{R})$ -form by the Cahn-Ingold-Prelog priority rule. However, the stereoselectivity of the enzyme was the same as other compounds.

$(\text{S})\text{-2f}$ : 7.5 mg, 0.0378 mmol, Y= 9.4%, >99% *ee*,  $[\alpha]_{\text{D}}^{24} +11.733$  (c 0.75,  $\text{CHCl}_3$ )

$(\text{R})\text{-1f}$ : 44.5 mg, 0.284 mmol, Y= 71.0%, 11.4% *ee*,  $[\alpha]_{\text{D}}^{24} -6.38$  (c 1.63,  $\text{CHCl}_3$ )

Conv. 10.2%, *E* value >200 (2237), Rate: 2.5  $\text{mM h}^{-1} \text{mg enzyme}^{-1}$

### IL1-PS-catalyzed reaction:

A mixture of ( $\pm$ )-**1f** (62.4 mg, 0.40 mmol), vinyl acetate (53.9 mg, 0.63 mmol), and **IL1-PS** (6.0 mg) in *i*-Pr<sub>2</sub>O (2.0 ml) was stirred at 35°C for 40 min. The reaction was quenched by addition of 1.0 ml of ethyl acetate and the enzyme was removed by filtration through a glass sintered filter with a Celite pad, then silica gel TLC (hexane/ ethyl acetate= 4:1) gave (*S*)-**2f** and (*R*)-**1f**.

(*S*)-**2f**: 22.1 mg, 0.111 mmol, Y= 27.8%, 97.9% *ee*,  $[\alpha]_D^{24} +45.9$  (c 0.88, CHCl<sub>3</sub>)

(*R*)-**1f**: 36.3 mg, 0.232 mmol, Y= 58.0%, 44.9% *ee*,  $[\alpha]_D^{22} -23.9$  (c 1.08, CHCl<sub>3</sub>)

Conv. 31.4%, *E* value 147, Rate: 68.1 mM h<sup>-1</sup> mg enzyme<sup>-1</sup>

#### **Tz1-PS catalyzed acetylation:**

A mixture of ( $\pm$ )-**1f** (62.6 mg, 0.40 mmol), vinyl acetate (52.8 mg, 0.60 mmol), and **Tz1-PS** (6.3 mg) in *i*-Pr<sub>2</sub>O (2.0 ml) was stirred at 35°C for 40 min. The reaction was quenched by addition of 1.0 ml of ethyl acetate and the enzyme was removed by filtration through a glass sintered filter with a Celite pad, then silica gel TLC (hexane/ ethyl acetate= 4:1) gave (*S*)-**2f** and (*R*)-**1f**.

(*S*)-**2f**: 22.0 mg, 0.117 mmol, Y= 27.7%, 96.5% *ee*,  $[\alpha]_D^{23} +73.4$  (c 1.54, CHCl<sub>3</sub>)

(*R*)-**1f**: 32.0 mg, 0.2043 mmol, Y= 51.1%, 48.0% *ee*,  $[\alpha]_D^{24} -12.0$  (c 1.22, CHCl<sub>3</sub>)

Conv. 33.2%, *E* value 90, Rate: 66.8 mM h<sup>-1</sup> mg enzyme<sup>-1</sup>

#### **Tz2-PS catalyzed acetylation:**

(*S*)-**2f**: 17.3 mg, 0.0871 mmol, Y= 21.7%, 97.2% *ee*,  $[\alpha]_D^{22} +66.8$  (c 1.00, CHCl<sub>3</sub>)

(*R*)-**1f**: 41.4 mg, 0.2644 mmol, Y= 66.1%, 40.2% *ee*,  $[\alpha]_D^{23} -21.3$  (c 1.25, CHCl<sub>3</sub>)

Conv. 29.3%, *E* value 1.5, Rate: 59.9 mM h<sup>-1</sup> mg enzyme<sup>-1</sup>

#### **Tz3-PS catalyzed acetylation:**

(*S*)-**2f**: 19.8 mg, 0.0997 mmol, Y= 24.9%, 97.4% *ee*,  $[\alpha]_D^{21} +65.1$  (c 1.13, CHCl<sub>3</sub>)

(*R*)-**1f**: 35.1 mg, 0.224 mmol, Y= 56.0%, 42.5% *ee*,  $[\alpha]_D^{22} -24.9$  (c 1.11, CHCl<sub>3</sub>)

Conv. 30.4%, *E* value 115, Rate: 63.2 mM h<sup>-1</sup> mg enzyme<sup>-1</sup>

### **2-7. Kinetic resolution of ( $\pm$ )-1-(pyridin-4-yl)ethan-1-ol (**1g**).**

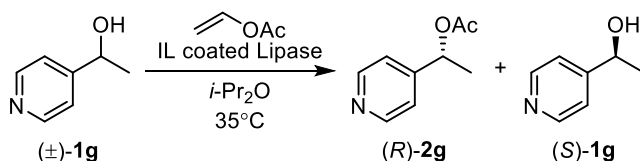

#### **Tz1-PS catalyzed acetylation:**

A mixture of ( $\pm$ )-**1g** (49.3 mg, 0.40 mmol), vinyl acetate (58.0 mg, 0.61 mmol), and **Tz1-PS** (6.9 mg) in *i*-Pr<sub>2</sub>O (2.0 ml) was stirred at 35°C for 40 min. The reaction was quenched by addition of 1.0 ml of ethyl acetate and the enzyme was removed by filtration through a glass sintered filter with a Celite pad, then silica gel TLC (ethyl acetate only) gave (*R*)-**2g** and (*S*)-**1g**.

(*R*)-**2g**: 18.8 mg, 0.115 mmol, Y= 28.6%, >99% *ee*,  $[\alpha]_D^{27} -0.0087$  (c 2.51, CHCl<sub>3</sub>)

(*S*)-**1g**: 29.0 mg, 0.236 mmol, Y= 58.9%, 49.8% *ee*,  $[\alpha]_D^{28} -1.159$  (c 0.69, CHCl<sub>3</sub>)

Conv. 33.3%, *E* value >200 (3287), Rate: 1016.3 mM h<sup>-1</sup> mg enzyme<sup>-1</sup>

#### **Tz2-PS catalyzed acetylation:**

(*R*)-**2g**: 23.6 mg, 0.143 mmol, Y= 35.7%, 99.8% *ee*,  $[\alpha]_{\text{D}}^{25} +95.1$  (c 2.00, CHCl<sub>3</sub>)

(*S*)-**1g**: 28.8 mg, 0.234 mmol, Y= 58.5%, 58.0% *ee*,  $[\alpha]_{\text{D}}^{26} -46.9$  (c 2.26, CHCl<sub>3</sub>)

Conv. 36.8%, *E* value >200 (1803), Rate: 592.2 mM h<sup>-1</sup> mg enzyme<sup>-1</sup>

#### Tz3-PS catalyzed acetylation:

(*R*)-**2g**: 25.9 mg, 0.157 mmol, 39.2 %, >99 % *ee*,  $[\alpha]_{\text{D}}^{25} +74.0$  (c 2.53, CHCl<sub>3</sub>)

(*S*)-**1g**: 29.3 mg, 0.238 mmol, 59.5 %, 55.7 % *ee*,  $[\alpha]_{\text{D}}^{26} -21.5$  (c 1.17, CHCl<sub>3</sub>)

Conv. 35.9%, *E* value >200 (701), Rate: 605.7 mM h<sup>-1</sup> mg enzyme<sup>-1</sup>

### 2-8. Kinetic resolution of (±)-1-(pyridin-3-yl)ethan-1-ol (**1h**).

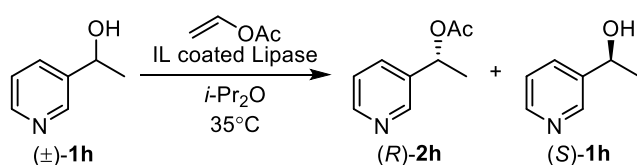

#### Tz1-PS catalyzed acetylation:

A mixture of (±)-**1h** (49.6 mg, 0.40 mmol), vinyl acetate (54.1 mg, 0.63 mmol), and **Tz1-PS** (5.2 mg) in *i*-Pr<sub>2</sub>O (2.0 ml) was stirred at 35°C for 40 min. The reaction was quenched by addition of 1.0 ml of ethyl acetate and the enzyme was removed by filtration through a glass sintered filter with a Celite pad, then silica gel TLC (ethyl acetate only) gave (*R*)-**2h** and (*S*)-**1h**.

(*R*)-**2h**: 24.5 mg, 0.149 mmol, Y= 37.3%, >99% *ee*,  $[\alpha]_{\text{D}}^{27} +2.37$  (c 2.11, CHCl<sub>3</sub>)

(*S*)-**1h**: 36.0 mg, 0.292 mmol, Y= 73.1%, 56.5% *ee*,  $[\alpha]_{\text{D}}^{27} -1.19$  (c 3.19, CHCl<sub>3</sub>)

Conv. 36.2%, *E* value >200 (589), Rate: 723.9 mM h<sup>-1</sup> mg enzyme<sup>-1</sup>

#### Tz2-PS catalyzed acetylation:

(*R*)-**2h**: 18.3 mg, 0.115 mmol, Y= 28.8%, >99% *ee*,  $[\alpha]_{\text{D}}^{27} +82.9$  (c 0.81, CHCl<sub>3</sub>)

(*S*)-**1h**: 38.3 mg, 0.311 mmol, 77.8%, Y= 47.9% *ee*,  $[\alpha]_{\text{D}}^{26} -15.6$  (c 1.10, CHCl<sub>3</sub>)

Conv. 32.4%, *E* value >200 (3220), Rate: 310.3 mM h<sup>-1</sup> mg enzyme<sup>-1</sup>

#### Tz3-PS catalyzed acetylation:

(*R*)-**2h**: 18.6 mg, 0.151 mmol, Y= 37.8%, >99% *ee*,  $[\alpha]_{\text{D}}^{23} +84.5$  (c 2.51, CHCl<sub>3</sub>)

(*S*)-**1h**: 18.2 mg, 0.1102 mmol, Y= 27.6%, 40.9% *ee*,  $[\alpha]_{\text{D}}^{23} -20.8$  (c 1.71, CHCl<sub>3</sub>)

Conv. 29.2%, *E* value >200 (373), Rate: 342.4 mM h<sup>-1</sup> mg enzyme<sup>-1</sup>

### 2-9. Kinetic resolution of (±)-1-(pyridin-2-yl)ethan-1-ol (**1i**)

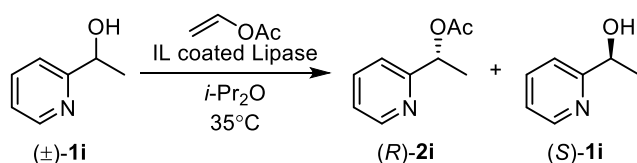

#### Tz1-PS catalyzed acetylation:

A mixture of (±)-**1i** (49.5 mg, 0.40 mmol), vinyl acetate (55.2 mg, 0.64 mmol), and **Tz1-PS** (5.1 mg) in *i*-Pr<sub>2</sub>O (2.0 ml) was stirred at 35°C for 40 min. The reaction was quenched by addition of 1.0 ml

of ethyl acetate and the enzyme was removed by filtration through a glass sintered filter with a Celite pad, then silica gel TLC (ethyl acetate only) gave (*R*)-**2i** and (*S*)-**1i**.

(*R*)-**2i**: 16.3 mg, 0.132 mmol, Y= 33.0 %, >99% *ee*,  $[\alpha]_{\text{D}}^{27} +1.16$  (c 0.69, CHCl<sub>3</sub>)

(*S*)-**1i**: 23.7 mg, 0.192 mmol, Y= 48.1%, 42.2% *ee*,  $[\alpha]_{\text{D}}^{28} -2.37$  (c 2.11, CHCl<sub>3</sub>)

Conv. 36.2%, *E* value >200(589), Rate: 604.8 mM h<sup>-1</sup> mg enzyme<sup>-1</sup>

**Tz2-PS catalyzed acetylation:**

(*R*)-**2i**: 11.2 mg, 0.0678 mmol, Y= 17.0%, >99% *ee*,  $[\alpha]_{\text{D}}^{25} +23.6$  (c 0.95, CHCl<sub>3</sub>)

(*S*)-**1i**: 19.5 mg, 0.158 mmol, Y= 39.6%, 24.0% *ee*,  $[\alpha]_{\text{D}}^{25} -3.8$  (c 1.07, CHCl<sub>3</sub>)

Conv. 19.4%, *E* value >200 (2528), Rate: 65.3 mM h<sup>-1</sup> mg enzyme<sup>-1</sup>

**Tz3-PS catalyzed acetylation:**

(*R*)-**2i**: 17.2 mg, 0.104 mmol, Y= 26.0%, >99% *ee*,  $[\alpha]_{\text{D}}^{26} +68.1$  (c 0.96, CHCl<sub>3</sub>)

(*S*)-**1i**: 17.6 mg, 0.145 mmol, Y= 36.1%, 62.9% *ee*,  $[\alpha]_{\text{D}}^{26} -7.78$  (c 0.72, CHCl<sub>3</sub>)

Conv. 38.7%, *E* value >200 (764), Rate: 145.2 mM h<sup>-1</sup> mg enzyme<sup>-1</sup>

**2-10. Kinetic resolution of (±)-1-(E)-4-phenylbut-3-en-2-ol (**1j**)**

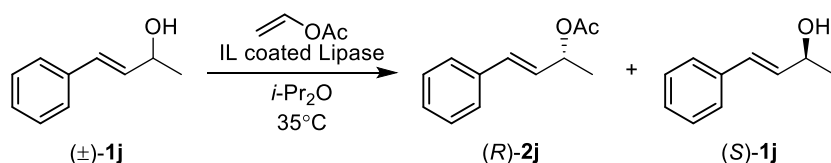

**Tz1-PS catalyzed acetylation:**

A mixture of (±)-**1j** (59.2 mg, 0.40 mmol), vinyl acetate (56.2 mg, 0.64 mmol), and **Tz1-PS** (6.2 mg) in *i*-Pr<sub>2</sub>O (2.0 ml) was stirred at 35°C for 40 min. The reaction was quenched by addition of 1.0 ml of ethyl acetate and the enzyme was removed by filtration through a glass sintered filter with a Celite pad, then silica gel TLC (hexane/ ethyl acetate = 6:1) gave (*R*)-**2j** and (*S*)-**1j**.

(*R*)-**2j**: 33.3 mg, 0.175 mmol, Y= 43.8%, >99% *ee*,  $[\alpha]_{\text{D}}^{27} +28.0$  (c 0.35, CHCl<sub>3</sub>)

(*S*)-**1j**: 29.2 mg, 0.197 mmol, Y= 49.3%, 77.7% *ee*,  $[\alpha]_{\text{D}}^{27} -2.42$  (c 1.32, CHCl<sub>3</sub>)

Conv. 43.8%, *E* value >200(4744), Rate: 549.7 mM h<sup>-1</sup> mg enzyme<sup>-1</sup>

**Tz2-PS catalyzed acetylation:**

(*R*)-**2j**: 17.8 mg, 0.0937 mmol, Y= 23.4%, >99% *ee*,  $[\alpha]_{\text{D}}^{23} +135.2$  (c 1.25, CHCl<sub>3</sub>)

(*S*)-**1j**: 29.2 mg, 0.258 mmol, Y= 64.5%, 36.1% *ee*,  $[\alpha]_{\text{D}}^{23} -12.7$  (c 1.18, CHCl<sub>3</sub>)

Conv. 26.5%, *E* value >200 (2849), Rate: 471.9 mM h<sup>-1</sup> mg enzyme<sup>-1</sup>

**Tz3-PS catalyzed acetylation:**

(*R*)-**2j**: 14.9 mg, 0.0784 mmol, Y= 19.6%, >99% *ee*,  $[\alpha]_{\text{D}}^{26} +116.7$  (c 1.16, CHCl<sub>3</sub>)

(*S*)-**1j**: 42.7 mg, 0.288 mmol, Y= 72.1%, 27.0% *ee*,  $[\alpha]_{\text{D}}^{26} -8.79$  (c 1.41, CHCl<sub>3</sub>)

Conv. 21.3%, *E* value >200 (2603), Rate: 397.6 mM h<sup>-1</sup> mg enzyme<sup>-1</sup>

## 2-11. Kinetic resolution of (±)-1-3-hydroxy-3-(thiophen-2-yl)propanenitrile (**1k**)

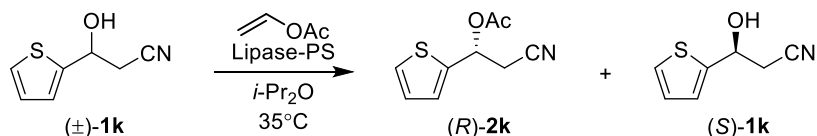

A mixture of (±)-**1k** (60.9 mg, 0.40 mmol), vinyl acetate (55.7 mg, 0.64 mmol), and lipase PS (30.5 mg) in *i*-Pr<sub>2</sub>O (2.0 ml) was stirred at 35°C for 12 h. The reaction was quenched by addition of 1.0 ml of ethyl acetate and the enzyme was removed by filtration through a glass sintered filter with a Celite pad, then silica gel TLC (hexane/ ethyl acetate = 1:1) gave (*R*)-**2k** and (*S*)-**1k**.

(*R*)-**2k**: 8.2 mg, 0.0420 mmol, Y= 10.2%, 98.8% *ee*,  $[\alpha]_D^{27} +83.0$  (c 0.66, CHCl<sub>3</sub>)

(*S*)-**1k**: 52.9 mg, 0.3969 mmol, Y= 86.8%, 13.5% *ee*,  $[\alpha]_D^{26} -68.9$  (c 1.22, CHCl<sub>3</sub>)

Conv. 12.0%, *E* value 189, Rate: 6.6 mM h<sup>-1</sup> mg enzyme<sup>-1</sup>

### IL1-PS catalyzed acetylation:

A mixture of (±)-**1k** (61.5 mg, 0.40 mmol), vinyl acetate (53.1 mg, 0.62 mmol), and IL1-PS (6.0 mg) in *i*-Pr<sub>2</sub>O (2.0 ml) was stirred at 35°C for 1 h. The reaction was quenched by addition of 1.0 ml of ethyl acetate and the enzyme was removed by filtration through a glass sintered filter with a Celite pad, then silica gel TLC (hexane/ ethyl acetate = 1:1) gave (*R*)-**2k** and (*S*)-**1k**.

(*R*)-**2k**: 26.0 mg, 0.133 mmol, Y= 33.3%, 92.3% *ee*,  $[\alpha]_D^{27} -14.2$  (c 1.07, CHCl<sub>3</sub>)

(*S*)-**1k**: 34.5 mg, 0.2252 mmol, Y= 56.3%, 47.6% *ee*,  $[\alpha]_D^{28} +80.2$  (c 0.91, CHCl<sub>3</sub>)

Conv. 34.0%, *E* value 40, Rate: 294.9 mM h<sup>-1</sup> mg enzyme<sup>-1</sup>

### Tz1-PS catalyzed acetylation:

A mixture of (±)-**1k** (61.2 mg, 0.40 mmol), vinyl acetate (53.8 mg, 0.62 mmol), and Tz1-PS (6.2 mg) in *i*-Pr<sub>2</sub>O (2.0 ml) was stirred at 35°C for 1 h. The reaction was quenched by addition of 1.0 ml of ethyl acetate and the enzyme was removed by filtration through a glass sintered filter with a Celite pad, then silica gel TLC (hexane/ ethyl acetate = 1:1) gave (*R*)-**2k** and (*S*)-**1k**.

(*R*)-**2k**: 24.9 mg, 0.128 mmol, Y= 31.1%, 97.2% *ee*,  $[\alpha]_D^{24} +77.0$  (c 1.06, CHCl<sub>3</sub>)

(*S*)-**1k**: 41.7 mg, 0.272 mmol, Y= 66.4%, 43.3% *ee*,  $[\alpha]_D^{24} -14.5$  (c 1.02, CHCl<sub>3</sub>)

Conv. 30.8%, *E* value 108, Rate: 167.9 mM h<sup>-1</sup> mg enzyme<sup>-1</sup>

### Tz2-PS catalyzed acetylation:

(*R*)-**2k**: 16.2 mg, 0.0831 mmol, Y= 20.8%, 96.4% *ee*,  $[\alpha]_D^{28} -88.3$  (c 1.20, CHCl<sub>3</sub>)

(*S*)-**1k**: 44.5 mg, 0.291 mmol, Y= 72.6%, 24.1% *ee*,  $[\alpha]_D^{27} +80.4$  (c 1.66, CHCl<sub>3</sub>)

Conv. 20.0%, *E* value 75, Rate: 160.2 mM h<sup>-1</sup> mg enzyme<sup>-1</sup>

### Tz3-PS catalyzed acetylation:

(*R*)-**2k**: 20.2 mg, 0.106 mmol, Y= 26.6%, 95.9% *ee*,  $[\alpha]_D^{24} +89.7$  (c 1.69, CHCl<sub>3</sub>)

(*S*)-**1k**: 45.5 mg, 0.2970 mmol, Y= 74.2%, 32.0% *ee*,  $[\alpha]_D^{25} -9.73$  (c 1.11, CHCl<sub>3</sub>)

Conv. 25.0%, *E* value 65, Rate: 218.9 mM h<sup>-1</sup> mg enzyme<sup>-1</sup>

## 2-12. Kinetic resolution of (±)-methyl 2-hydroxy-2-phenylacetate (**1l**)

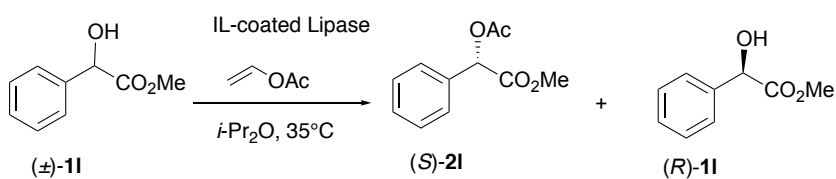

### **Tz1-PS catalyzed acetylation:**

A mixture of  $(\pm)\text{-11}$  (66.5 mg, 0.40 mmol), vinyl acetate (55.2 mg, 0.64 mmol), and **Tz1-PS** (6.7 mg) in *i*-Pr<sub>2</sub>O (2.0 ml) was stirred at 35°C for 1 h. The reaction was quenched by addition of 1.0 ml of ethyl acetate and the enzyme was removed by filtration through a glass sintered filter with a Celite pad, then silica gel TLC (hexane/ ethyl acetate = 4:1) gave (*S*)-**21** and (*R*)-**11**. The acetate **21** produced was assigned to be as (*S*)-form and the alcohol **11** unreacted was to be (*R*)-form by the Cahn-Ingold-Prelog priority rule. However, the stereoselectivity of the enzyme was the same as other compounds.

(*S*)-**21**: 25.2 mg, 0.121 mmol, Y= 30.3%, 90.6% *ee*,  $[\alpha]_{\text{D}}^{21} +115.8$  (c 2.03, CHCl<sub>3</sub>)

(*R*)-**11**: 25.4 mg, 0.1528 mmol, Y= 38.2%, >99% *ee*,  $[\alpha]_{\text{D}}^{22} -150.3$  (c 2.02, CHCl<sub>3</sub>)

Conv. 52.4%, *E* value 151, Rate: 17.5 mM h<sup>-1</sup> mg enzyme<sup>-1</sup>

### **Tz2-PS catalyzed acetylation:**

(*S*)-**21**: 32.3 mg, 0.155 mmol, Y= 38.8%, 96.5% *ee*,  $[\alpha]_{\text{D}}^{22} +100.0$  (c 1.13, CHCl<sub>3</sub>)

(*R*)-**11**: 32.6 mg, 0.2023 mmol, Y= 50.6%, 81.4% *ee*,  $[\alpha]_{\text{D}}^{23} -78.9$  (c 1.26, CHCl<sub>3</sub>)

Conv. 45.8%, *E* value 142, Rate: 16.0 mM h<sup>-1</sup> mg enzyme<sup>-1</sup>

### **Tz3-PS catalyzed acetylation:**

(*S*)-**21**: 35.0 mg, 0.168 mmol, Y= 42.0%, 95.1% *ee*,  $[\alpha]_{\text{D}}^{24} +128.4$  (c 1.00, CHCl<sub>3</sub>)

(*R*)-**11**: 35.3 mg, 0.2124 mmol, Y= 53.1%, 93.6% *ee*,  $[\alpha]_{\text{D}}^{25} -141.9$  (c 1.04, CHCl<sub>3</sub>)

Conv. 49.6%, *E* value 140, Rate: 17.5 mM h<sup>-1</sup> mg enzyme<sup>-1</sup>

**Table S1.** List of retention time (tR) of alcohols in the HPLC analysis reported in Table 1.

| Compound                                                                                         | Separation conditions: flow speed (solvent ratio), column temp | tR( min.)                                            | Compound                                                                                         | Separation conditions: flow speed (solvent ratio), column temp | tR( min.)                                            |
|--------------------------------------------------------------------------------------------------|----------------------------------------------------------------|------------------------------------------------------|--------------------------------------------------------------------------------------------------|----------------------------------------------------------------|------------------------------------------------------|
| 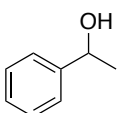<br><b>1a</b>   | OB-H<br>1.0 ml/min<br>5.0%<br>35°C                             | S: 8.494<br>R: 12.756                                | <br><b>1g</b>   | OD-H<br>1.0ml/min<br>7.0%<br>35°C                              | S: 16.164<br>R: 18.096                               |
| <br><b>1b</b>   | OD-H<br>1.0ml/min<br>2.0%<br>35°C                              | S: 16.945<br>R: 19.046                               | <br><b>1h</b>   | OB-H<br>1.0ml/min<br>11.1%<br>35°C                             | S: 6.912<br>R: 10.911                                |
| <br><b>1c</b>  | OB-H<br>1.0ml/min<br>1.0%<br>35°C                              | S: 35.269<br>R: 40.379                               | <br><b>1i</b>  | OD-H<br>1.0ml/min<br>1.0%<br>35°C                              | S: 23.885<br>R: 21.317                               |
| <br><b>1d</b> | OD-H<br>1.0ml/min<br>11%<br>35°C                               | S: 8.104<br>R: 8.989                                 | <br><b>1j</b> | OJ-H<br>1.0ml/min<br>1.0%<br>35°C                              | S: 39.065<br>R: 41.715                               |
| <br><b>1e</b> | OB-H<br>1.0ml/min<br>2.5%<br>35°C                              | S: 17.048<br>R: 26.603                               | <br><b>1k</b> | OJ-H<br>1.0ml/min<br>15%<br>25°C                               | S: 38.558<br>R: 43.239                               |
| <br><b>1f</b> | OB-H<br>1.0ml/min<br>1.0%<br>35°C                              | R <sup>a)</sup> : 21.883<br>S <sup>a)</sup> : 26.773 | <br><b>1l</b> | OB-H<br>1.0ml/min<br>5.0%<br>35°C                              | R <sup>a)</sup> : 16.143<br>S <sup>a)</sup> : 17.255 |

<sup>a)</sup>The assignment was made by the Cahn-Ingold-Prelog priority rule.



**Table S2.** List of retention time (tR) of acetates in the HPLC analysis reported in Table 1.

| Compound                                                                                         | Separation conditions: flow speed (solvent ratio), column temp | tR( min.)                                           | Compound                                                                                         | Separation conditions: flow speed (solvent ratio), column temp | tR( min.)                                            |
|--------------------------------------------------------------------------------------------------|----------------------------------------------------------------|-----------------------------------------------------|--------------------------------------------------------------------------------------------------|----------------------------------------------------------------|------------------------------------------------------|
| 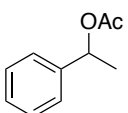<br><b>2a</b>   | OB-H<br>1.0ml/min<br>0.5%<br>35°C                              | S: 19.825<br>R: 17.606                              | <br><b>2f</b>   | OB-H<br>1.0ml/min<br>5.0%<br>35°C                              | S: 7.644<br>R: 6.962                                 |
| <br><b>2b</b>   | OD-H<br>0.5ml/min<br>0.1%<br>40°C                              | S: 16.297<br>R: 10.122                              | <br><b>2g</b>   | OD-H<br>1.0ml/min<br>4.8%<br>35°C                              | S: 13.005<br>R: 11.175                               |
| <br><b>2c</b>  | OD-H<br>1.0ml/min<br>1.5%<br>35°C                              | S: 15.558<br>R: 13.642                              | <br><b>2h</b>  | OB-H<br>1.0ml/min<br>2.5%<br>35°C                              | S: 16.048<br>R: 17.484                               |
| <br><b>2d</b> | OB-H<br>1.0ml/min<br>0.5%<br>35°C                              | S: 19.863<br>R: 17.437                              | <br><b>2j</b> | OB-H<br>1.0ml/min<br>5.0%<br>35°C                              | S: 7.932<br>R: 9.319                                 |
| <br><b>2e</b> | OJ-H<br>1.0ml/min<br>0.5%<br>35°C                              | S: 15.348<br>R: 14.376                              | <br><b>2k</b> | OJ-H<br>0.5ml/min<br>0.1%<br>25°C                              | S: 58.997<br>R: 65.606                               |
| <br><b>2k</b> | OJ-H<br>1.0ml/min<br>1.0%<br>35°C                              | R <sup>a)</sup> : 11.616<br>S <sup>a)</sup> : 9.511 | <br><b>2l</b> | OB-H<br>1.0ml/min<br>1.0%<br>35°C                              | R <sup>a)</sup> : 21.621<br>S <sup>a)</sup> : 19.006 |

<sup>a)</sup> The assignment was made by the Cahn-Ingold-Prelog priority rule.

### 3. Determination of the Kinetic Parameters

The reaction rates were determined by the experiments as follows: the reaction mixture was sampled at appropriate reaction interval (10 min, 15 min, and 20 min) and determined % conversion by capillary GC analysis (Quadrex bonded fused silica methyl silicone,  $\phi$  0.25 mm  $\times$  25 m, He) in the presence of an internal reference.

#### 3-1. (R)-1h as a model substrate.

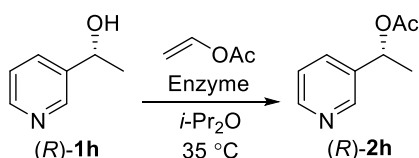

**Table S3. Results of IL1-PS in *i*-Pr<sub>2</sub>O for (R)-1h.**

| [S] (M) | V (M min <sup>-1</sup> mg <sup>-1</sup> ) <sup>a)</sup> | 1/[S] (M <sup>-1</sup> ) | 1/V (M <sup>-1</sup> min mg) <sup>a)</sup> |
|---------|---------------------------------------------------------|--------------------------|--------------------------------------------|
| 0.35    | 2.86                                                    | 0.104                    | 9.58                                       |
| 0.3     | 3.33                                                    | 0.064                    | 15.6                                       |
| 0.25    | 4.00                                                    | 0.103                    | 9.71                                       |
| 0.2     | 5.00                                                    | 0.066                    | 15.1                                       |
| 0.15    | 6.67                                                    | 0.053                    | 19.0                                       |
| 0.1     | 10.0                                                    | 0.033                    | 30.1                                       |

<sup>a)</sup>“mg” corresponds to the lipase protein

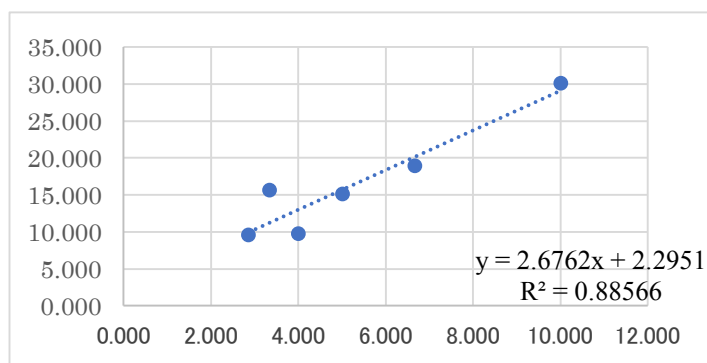

**Figure S1.** Lineweaver-Burk plots of IL1-PS-catalyzed reaction of (R)-1h in *i*-Pr<sub>2</sub>O. Here “y” means 1/[V], “x” means 1/[S]. Using the results, kinetic data were determined as follows:  $V_{\max}$  = 0.436 (M min<sup>-1</sup> mg<sup>-1</sup>),  $K_m$  = 1.166 (M),  $K_{cat}$  = 2.33 (min<sup>-1</sup>),  $K_{cat}/K_m$  = 2.00 (M<sup>-1</sup> min<sup>-1</sup>).

**Table S4. Results of Tz1-PS in *i*-Pr<sub>2</sub>O for (R)-1h.**

| [S] (M) | V (M min <sup>-1</sup> mg <sup>-1</sup> ) <sup>a)</sup> | 1/[S] (M <sup>-1</sup> ) | 1/V (M <sup>-1</sup> min mg) <sup>a)</sup> |
|---------|---------------------------------------------------------|--------------------------|--------------------------------------------|
| 0.35    | 2.86                                                    | 0.078                    | 12.8                                       |
| 0.3     | 3.33                                                    | 0.076                    | 13.2                                       |
| 0.25    | 4.00                                                    | 0.071                    | 14.1                                       |
| 0.2     | 5.00                                                    | 0.068                    | 14.6                                       |

|      |      |       |      |
|------|------|-------|------|
| 0.15 | 6.67 | 0.062 | 16.0 |
| 0.1  | 10.0 | 0.049 | 20.4 |

a)“mg” corresponds to the lipase protein

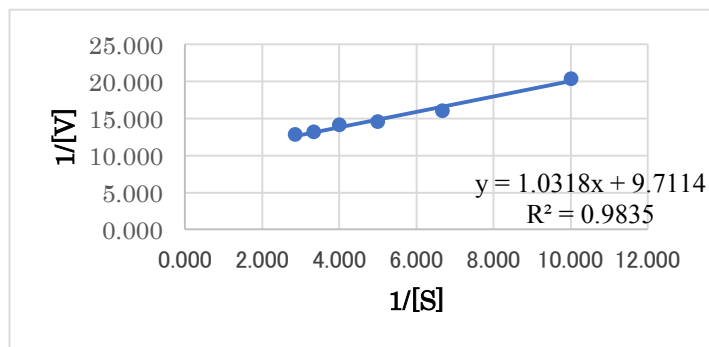

**Figure S2.** Lineweaver-Burk plots of **Tz1-PS**-catalyzed reaction of **(R)-1h** in *i*-Pr<sub>2</sub>O. Here “y” means 1/[V], “x” means 1/[S]. Using the results, kinetic data were determined as follows:  $V_{\max} = 0.103$  (M min<sup>-1</sup> mg<sup>-1</sup>),  $K_m = 0.106$  (M),  $K_{\text{cat}} = 0.566$  (min<sup>-1</sup>),  $K_{\text{cat}}/K_m = 5.32$  (M<sup>-1</sup> min<sup>-1</sup>).

**Table S5. Results of Tz2-PS in *i*-Pr<sub>2</sub>O for (R)-1h.**

| [S] (M) | V (M min <sup>-1</sup> mg <sup>-1</sup> ) <sup>a)</sup> | 1/[S] (M <sup>-1</sup> ) | 1/V (M <sup>-1</sup> min mg) <sup>a)</sup> |
|---------|---------------------------------------------------------|--------------------------|--------------------------------------------|
| 0.35    | 2.86                                                    | 0.044                    | 22.6                                       |
| 0.3     | 3.33                                                    | 0.061                    | 16.4                                       |
| 0.25    | 4.00                                                    | 0.036                    | 28.1                                       |
| 0.2     | 5.00                                                    | 0.038                    | 26.3                                       |
| 0.15    | 6.67                                                    | 0.027                    | 37.1                                       |
| 0.1     | 10.0                                                    | 0.017                    | 57.9                                       |

a)“mg” corresponds to the lipase protein

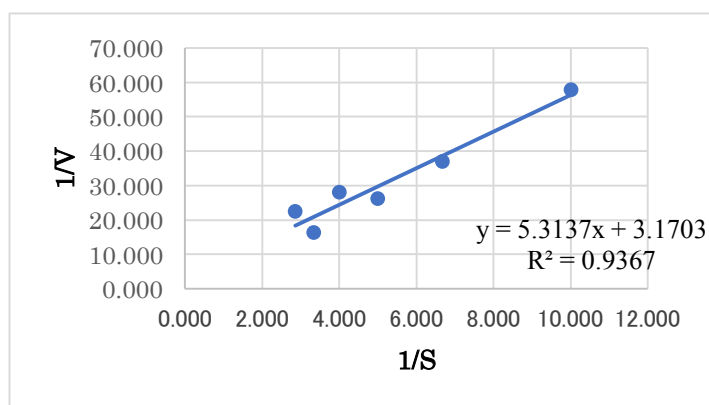

**Figure S3.** Lineweaver-Burk plots of **Tz2-PS**-catalyzed reaction of **(R)-1h** in *i*-Pr<sub>2</sub>O. Here “y” means 1/[V], “x” means 1/[S]. Using the results, kinetic data were determined as follows:  $V_{\max} = 0.315$  (M min<sup>-1</sup> mg<sup>-1</sup>),  $K_m = 1.68$  (M),  $K_{\text{cat}} = 1.57$  (min<sup>-1</sup>),  $K_{\text{cat}}/K_m = 0.937$  (M<sup>-1</sup> min<sup>-1</sup>).

**Table S6. Results of Tz3-PS in *i*-Pr<sub>2</sub>O for (*R*)-1h.**

| [S] (M) | V (M min <sup>-1</sup> mg <sup>-1</sup> ) <sup>a)</sup> | 1/[S] (M <sup>-1</sup> ) | 1/V (M <sup>-1</sup> min mg) <sup>a)</sup> |
|---------|---------------------------------------------------------|--------------------------|--------------------------------------------|
| 0.35    | 2.86                                                    | 0.044                    | 22.9                                       |
| 0.3     | 3.33                                                    | 0.036                    | 27.7                                       |
| 0.25    | 4.00                                                    | 0.039                    | 25.9                                       |
| 0.2     | 5.00                                                    | 0.024                    | 41.5                                       |
| 0.15    | 6.67                                                    | 0.020                    | 50.9                                       |
| 0.1     | 10.0                                                    | 0.016                    | 64.3                                       |

a)“mg” corresponds to the lipase protein

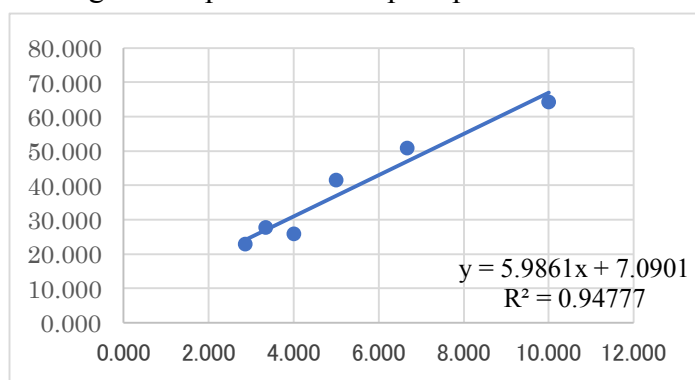

**Figure S4.** Lineweaver-Burk plots of Tz3-PS-catalyzed reaction of (*R*)-1h in *i*-Pr<sub>2</sub>O. Here “y” means 1/[V], “x” means 1/[S]. Using the results, kinetic data were determined as follows: V<sub>max</sub> = 0.141 (M min<sup>-1</sup> mg<sup>-1</sup>), K<sub>m</sub> = 0.844 (M), K<sub>cat</sub> = 0.778 (min<sup>-1</sup>), K<sub>cat</sub>/K<sub>m</sub> = 0.922 (M<sup>-1</sup> min<sup>-1</sup>).

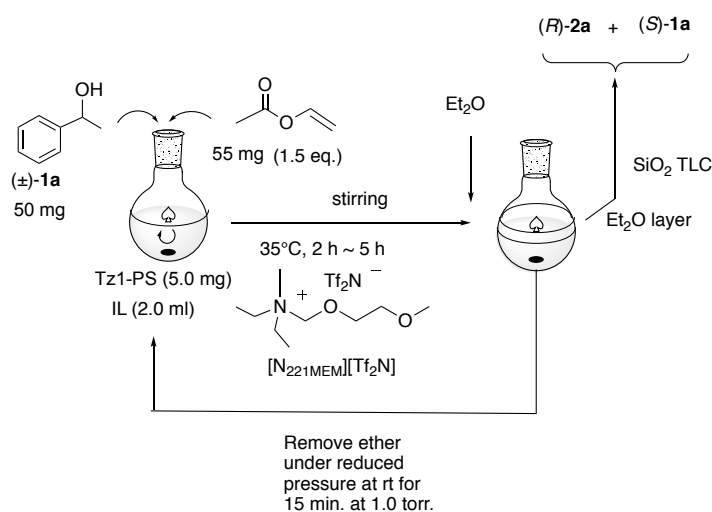

**Figure S5.** Recycle procedure of Tz1-PS.

**Table S7. Results of recyclable use experiment of Tz1-PS in [N<sub>221</sub>MEM][Tf<sub>2</sub>N].**

| Run                     | Substrate<br>Amount:<br>mg | Reaction<br>time | Isolated acetate and alcohol<br>product | Isolated acetate and alcohol |        |        | % ee            | Conv. and E value             |
|-------------------------|----------------------------|------------------|-----------------------------------------|------------------------------|--------|--------|-----------------|-------------------------------|
|                         |                            |                  |                                         | Amount:<br>mg                | mmol   | %Yield |                 |                               |
| 1st                     | 50.5                       | 1 h              | ( <i>R</i> )- <b>2a</b> :               | 28.6                         | 0.176  | 43.7%  | >99% <i>ee</i>  | Conv. 48.0%,<br><i>E</i> >200 |
|                         |                            |                  | ( <i>S</i> )- <b>1a</b> :               | 17.2                         | 0.758  | 35.2%  | 92.4% <i>ee</i> |                               |
| 2nd                     | 49.5                       | 1 h              | ( <i>R</i> )- <b>2a</b> :               | 28.9                         | 0.176  | 42.9%  | >99% <i>ee</i>  | Conv. 49.2%,<br><i>E</i> >200 |
|                         |                            |                  | ( <i>S</i> )- <b>1a</b> :               | 20.0                         | 0.164  | 40.0%  | 96.9% <i>ee</i> |                               |
| 3rd                     | 49.8                       | 1.5 h            | ( <i>R</i> )- <b>2a</b> :               | 28.5                         | 0.175  | 42.1%  | >99% <i>ee</i>  | Conv. 50.0%,<br><i>E</i> >200 |
|                         |                            |                  | ( <i>S</i> )- <b>1a</b> :               | 11.7                         | 0.0958 | 23.4%  | >99% <i>ee</i>  |                               |
| 4th                     | 50.5                       | 2.5 h            | ( <i>R</i> )- <b>2a</b> :               | 29.3                         | 0.202  | 44.6%  | >99% <i>ee</i>  | Conv. 50.0%,<br><i>E</i> >200 |
|                         |                            |                  | ( <i>S</i> )- <b>1a</b> :               | 9.6                          | 0.0786 | 28.8%  | >99% <i>ee</i>  |                               |
| 5th                     | 50.7                       | 2 h              | ( <i>R</i> )- <b>2a</b> :               | 28.8                         | 0.176  | 44.0%  | >99% <i>ee</i>  | Conv. 50.0%,<br><i>E</i> >200 |
|                         |                            |                  | ( <i>S</i> )- <b>1a</b> :               | 11.0                         | 0.0900 | 22.5%  | >99% <i>ee</i>  |                               |
| 6th                     | 51.8                       | 2 h              | ( <i>R</i> )- <b>2a</b> :               | 31.3                         | 0.191  | 47.7%  | >99% <i>ee</i>  | Conv. 50.0%,<br><i>E</i> >200 |
|                         |                            |                  | ( <i>S</i> )- <b>1a</b> :               | 25.5                         | 0.209  | 52.3%  | >99% <i>ee</i>  |                               |
| 7th                     | 50.8                       | 1.5 h            | ( <i>R</i> )- <b>2a</b> :               | 24.3                         | 0.146  | 36.5%  | 99.2% <i>ee</i> | Conv. 48.7%,<br><i>E</i> >200 |
|                         |                            |                  | ( <i>S</i> )- <b>1a</b> :               | 19.1                         | 0.156  | 39.1%  | 94.0% <i>ee</i> |                               |
| 8th                     | 59.1                       | 1.5 h            | ( <i>R</i> )- <b>2a</b> :               | 23.9                         | 0.146  | 36.4%  | >99% <i>ee</i>  | Conv. 46.4%,<br><i>E</i> >200 |
|                         |                            |                  | ( <i>S</i> )- <b>1a</b> :               | 13.7                         | 0.112  | 28.0%  | 86.6% <i>ee</i> |                               |
| 9th                     | 54.4                       | 1.5 h            | ( <i>R</i> )- <b>2a</b> :               | 28.1                         | 0.171  | 42.8%  | >99% <i>ee</i>  | Conv. 47.6%,<br><i>E</i> >200 |
|                         |                            |                  | ( <i>S</i> )- <b>1a</b> :               | 26.9                         | 0.220  | 55.1%  | 90.8% <i>ee</i> |                               |
| 10th                    | 51.0                       | 2 h              | ( <i>R</i> )- <b>2a</b> :               | 20.9                         | 0.127  | 31.8%  | >99% <i>ee</i>  | Conv. 48.8%,<br><i>E</i> >200 |
|                         |                            |                  | ( <i>S</i> )- <b>1a</b> :               | 20.1                         | 0.165  | 41.1%  | 95.2% <i>ee</i> |                               |
| a month <sup>a)</sup>   | 50.0                       | 2 h              | ( <i>R</i> )- <b>2a</b> :               | 31.1                         | 0.191  | 47.7%  | >99% <i>ee</i>  | Conv. 50.0%,<br><i>E</i> >200 |
|                         |                            |                  | ( <i>S</i> )- <b>1a</b> :               | 27.0                         | 0.225  | 50.3%  | >99% <i>ee</i>  |                               |
| 6 months <sup>b)</sup>  | 50.0                       | 2 h              | ( <i>R</i> )- <b>2a</b> :               | 27.5                         | 0.169  | 41.8%  | >99% <i>ee</i>  | Conv. 48.8%,<br><i>E</i> >200 |
|                         |                            |                  | ( <i>S</i> )- <b>1a</b> :               | 20.1                         | 0.165  | 41.1%  | 95.2% <i>ee</i> |                               |
| 12 months <sup>b)</sup> | 49.0                       | 2 h              | ( <i>R</i> )- <b>2a</b> :               | 27.8                         | 0.1693 | 42.3%  | >99% <i>ee</i>  | Conv. 50.0%,<br><i>E</i> >200 |
|                         |                            |                  | ( <i>S</i> )- <b>1a</b> :               | 19.9                         | 0.1629 | 40.7%  | >99% <i>ee</i>  |                               |
| 18 months <sup>b)</sup> | 51.3                       | 5 h              | ( <i>R</i> )- <b>2a</b> :               | 24.2                         | 0.149  | 36.1%  | >99% <i>ee</i>  | Conv. 44.2%,<br><i>E</i> >200 |
|                         |                            |                  | ( <i>S</i> )- <b>1a</b> :               | 22.0                         | 0.180  | 44.0%  | 79.1% <i>ee</i> |                               |
| 2 years <sup>b)</sup>   | 51.2                       | 5 h              | ( <i>R</i> )- <b>2a</b> :               | 30.2                         | 0.184  | 44.9%  | 98.5% <i>ee</i> | Conv. 50.2%,<br><i>E</i> >200 |
|                         |                            |                  | ( <i>S</i> )- <b>1a</b> :               | 20.6                         | 0.1686 | 41.1%  | 99.3% <i>ee</i> |                               |

<sup>a)</sup> Stored at rt (ca. 25°C). <sup>b)</sup> Stored at 4°C in a refrigerator

<sup>1</sup>H NMR of S9

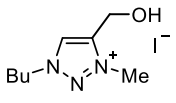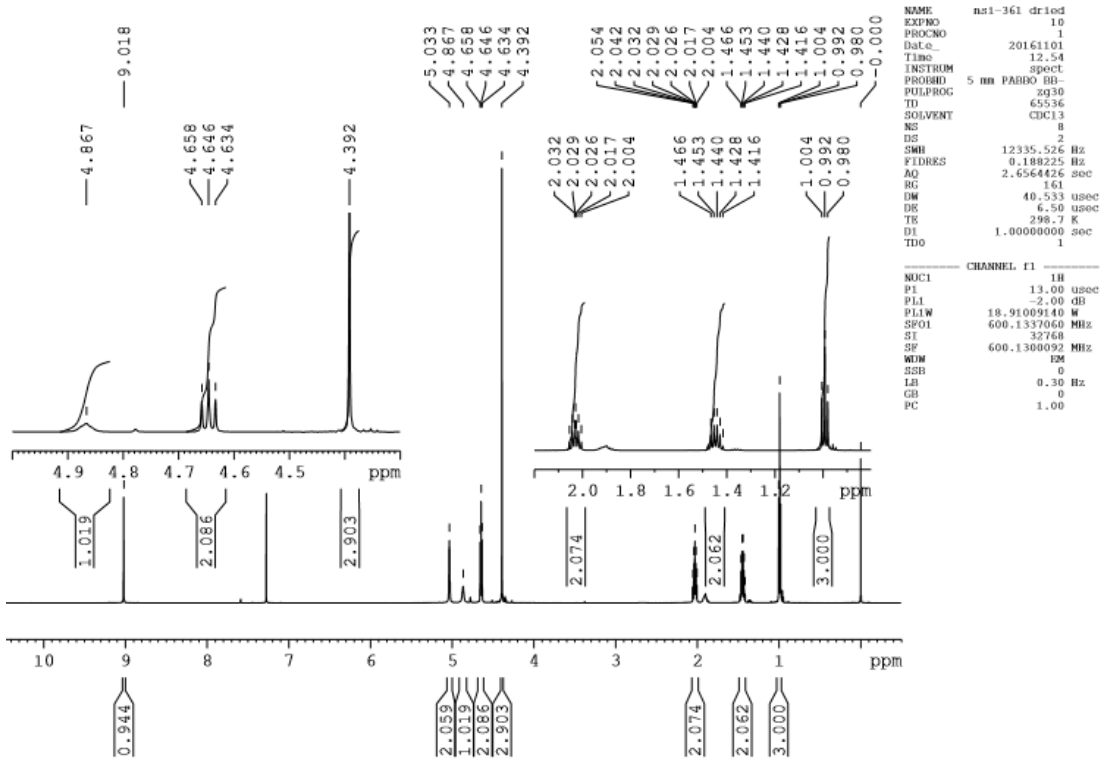

<sup>13</sup>C NMR of S9

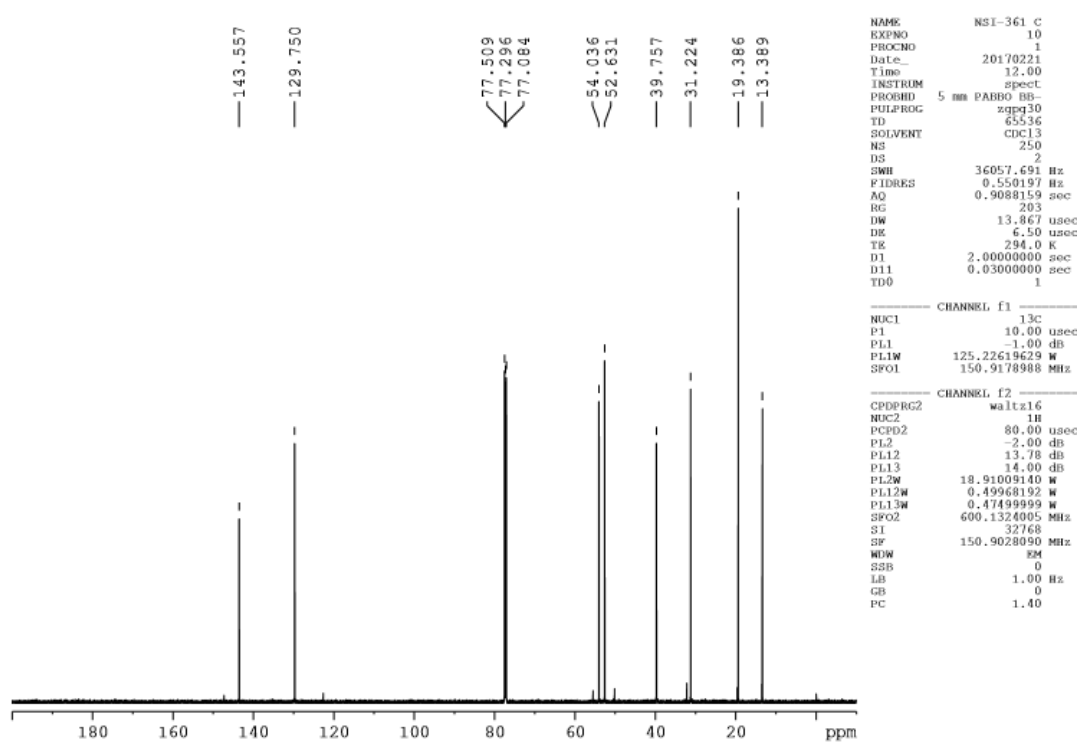

# <sup>1</sup>H NMR of Tz1

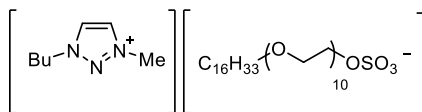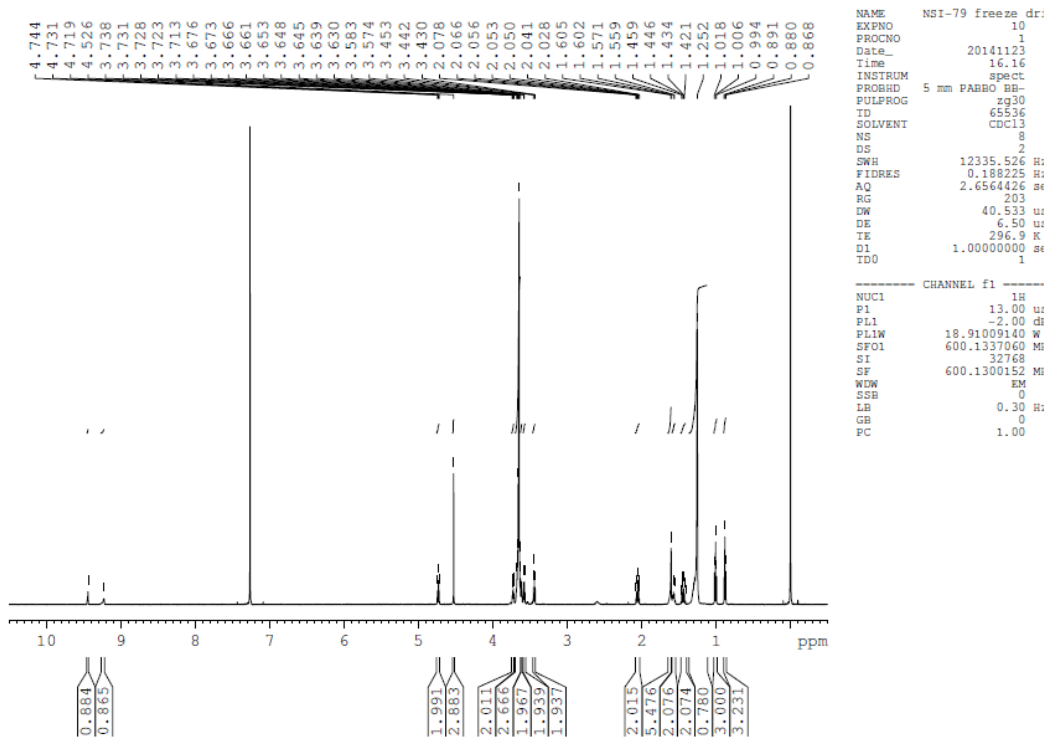

```

NAME      NSI-79 freeze dr:
EXPNO    10
PROCNO   1
Date_    20141123
Time     16.16
INSTRUM  spect
PROBHD   5 mm PABBO BB-
PULPROG  zg30
TD        65536
SOLVENT  CDCl3
NS        8
DS        2
SWH       12335.526 Hz
FIDRES   0.188225 Hz
AQ        2.6564424 sec
RG        203
DW        40.533 usec
DE        6.50 usec
TE        296.9 K
D1        1.00000000 sec
TD0       1

----- CHANNEL f1 -----
NUC1     1H
P1       13.00 usec
PL1     -2.00 dB
PL1W    18.91009140 W
SFO1     600.1337060 MHz
SI       32768
SF       600.1300152 MHz
WDW      EM
SSB      0
LB       0.30 Hz
GB       0
PC       1.00
    
```

# <sup>13</sup>C NMR of Tz1

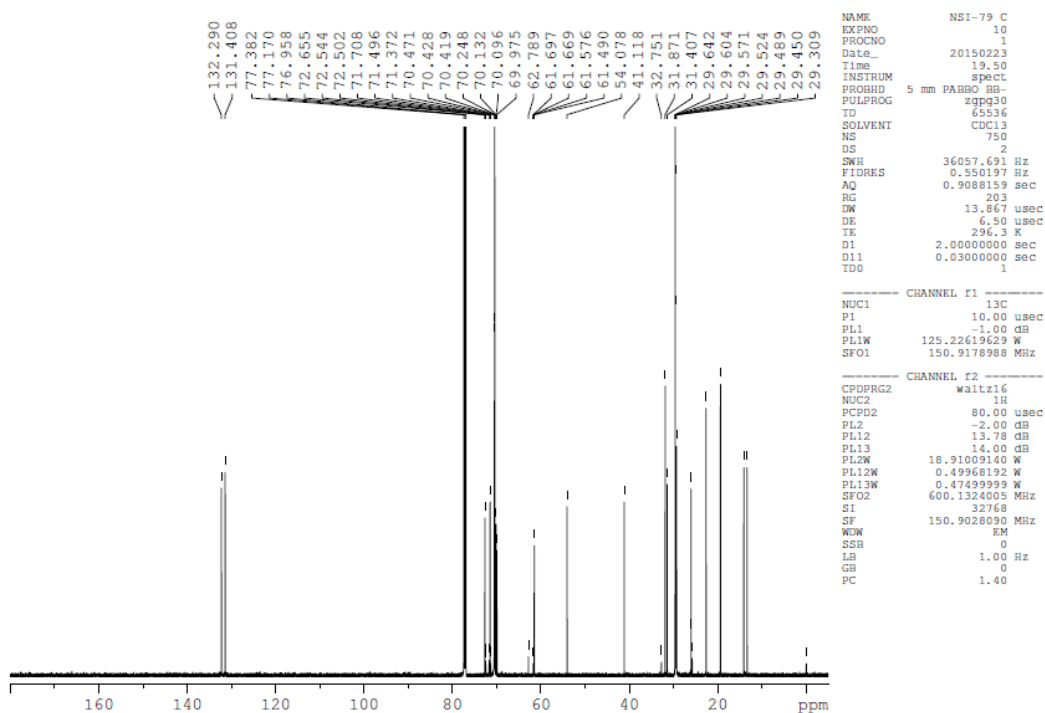

```

NAME      NSI-79 C
EXPNO    10
PROCNO   1
Date_    20150223
Time     19.50
INSTRUM  spect
PROBHD   5 mm PABBO BB-
PULPROG  zgpg30
TD        65536
SOLVENT  CDCl3
NS        2
DS        2
SWH       36057.691 Hz
FIDRES   0.550197 Hz
AQ        0.9088159 sec
RG        203
DW        13.867 usec
DE        6.50 usec
TE        296.3 K
D1        2.00000000 sec
D11       0.03000000 sec
TD0       1

----- CHANNEL f1 -----
NUC1     13C
P1       10.00 usec
PL1     -1.00 dB
PL1W    125.22619629 W
SFO1     150.9178988 MHz

----- CHANNEL f2 -----
CPDPRG2  waltz16
NUC2     1H
PCPD2   80.00 usec
PL2     -2.00 dB
PL12    13.78 dB
PL13    14.00 dB
PL2W    18.91009140 W
PL12W   0.49968192 W
PL13W   0.47499999 W
SFO2     600.1324005 MHz
SI       32768
SF       150.9028090 MHz
WDW      EM
SSB      0
LB       1.00 Hz
GB       0
PC       1.40
    
```

# <sup>1</sup>H NMR of Tz2

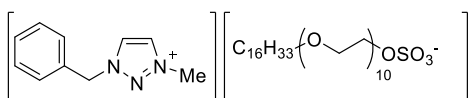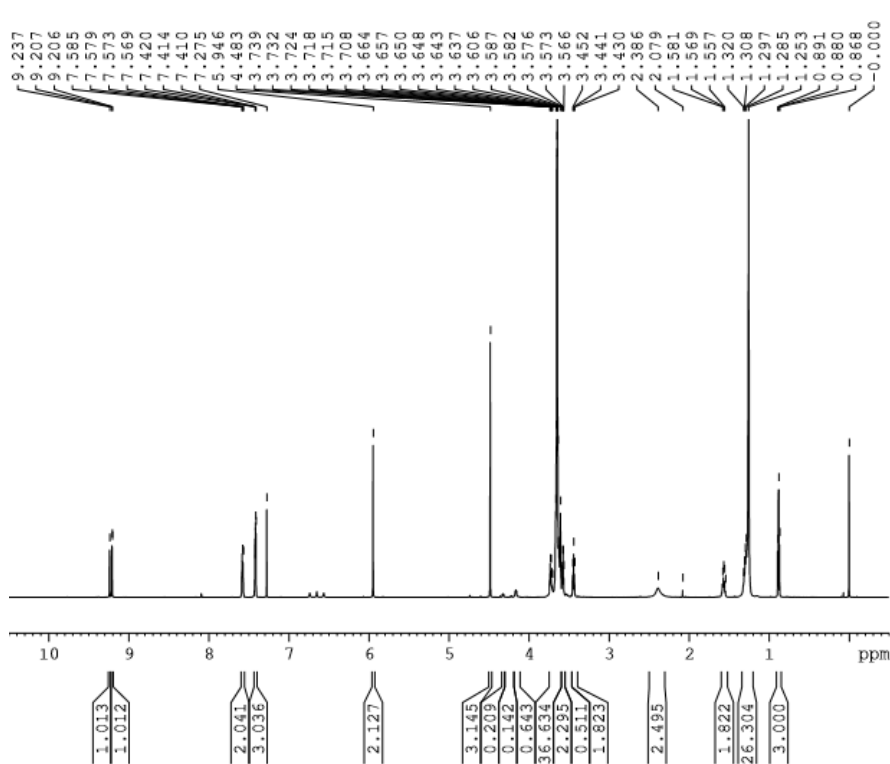

```

NAME      NSI-342 freezed 2
EXPNO    10
PROCNO   1
Date_    20161001
Time     12.22
INSTRUM  spect
PROBHD   5 mm PABBO BB-
PULPROG  zg30
TD        65536
SOLVENT  CDCl3
NS        2
DS        16
SWH       12335.526 Hz
FIDRES    0.188225 Hz
AQ        2.6564426 sec
RG        90.5
DM        40.533 usec
DE        6.50 usec
TE        298.2 K
D1        1.00000000 sec
TD0       1

CHANNEL f1
NUC1      1H
P1        13.00 usec
PL1       -2.00 dB
PL1W      18.91009140 W
SFO1      600.1337060 MHz
SI        32768
SF        600.1300075 MHz
WDW       EM
SSB       0
LB        0.30 Hz
GB        0
PC        1.00
    
```

# <sup>13</sup>C NMR of Tz2

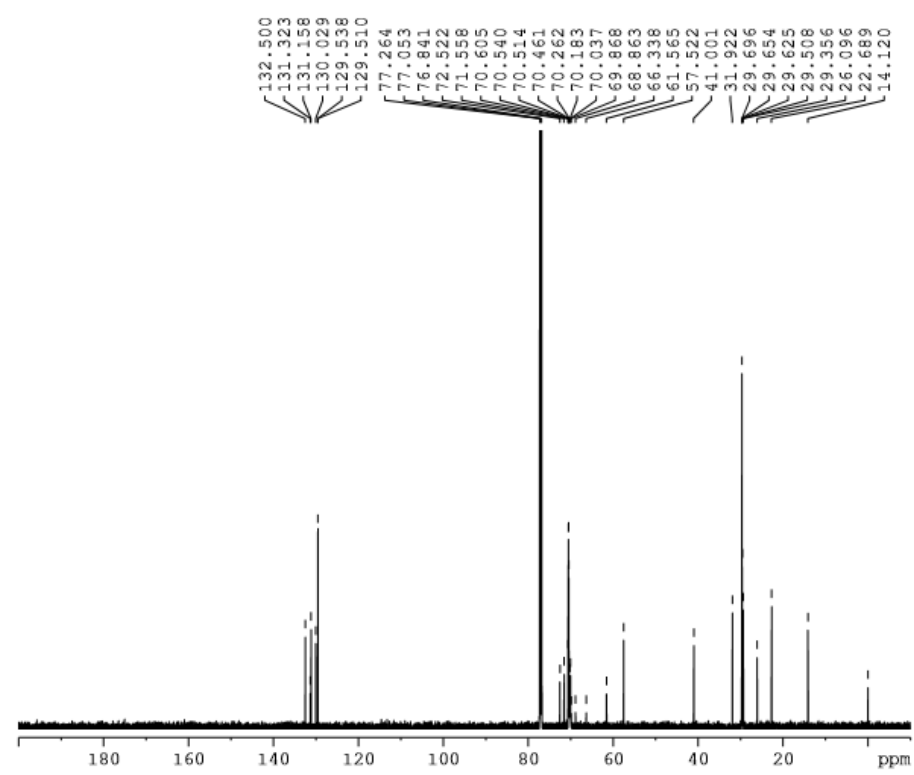

```

NAME      NSI-342 freezed c
EXPNO    10
PROCNO   1
Date_    20161001
Time     12.58
INSTRUM  spect
PROBHD   5 mm PABBO BB-
PULPROG  zgpg30
TD        65536
SOLVENT  CDCl3
NS        2
DS        700
SWH       36057.491 Hz
FIDRES    0.550197 Hz
AQ        0.9088159 sec
RG        203
DM        13.867 usec
DE        6.50 usec
TE        299.9 K
D1        2.00000000 sec
D11       0.03000000 sec
TD0       1

CHANNEL f1
NUC1      13C
P1        10.00 usec
PL1       -1.00 dB
PL1W      125.22619629 W
SFO1      150.9178988 MHz

CHANNEL f2
CPDPRG2  waltz16
NUC2      1H
PCPD2    80.00 usec
PL2       -2.00 dB
PL12     13.78 dB
PL13     14.00 dB
PL2W     18.91009140 W
PL12W    0.49968192 W
PL13W    0.47499999 W
SFO2     600.1324005 MHz
SI        32768
SF        150.9028080 MHz
WDW       EM
SSB       0
LB        1.00 Hz
GB        0
PC        1.40
    
```





## References

- [1] Y. Jeong, J-S. Ryu, *J. Org. Chem.* 2010, **75**, 4183.
- [2] N. Srivastava, M. Shukla, S. Saha, *Indian J. Chem.* 2010, **49A**, 757.
- [3] T. Itoh, Y. Matsushita, Y. Abe, S-H. Han, S. Wada, S. Hayase, M. Kawatsura, S. Takai, M. Morimoto, Y. Hirose, Y. *Chem. Eur. J.* 2006, **12**, 9228.
- [4] R. Romeo, S. V. Giofre, C. Carnovale, A. Campisi, R. Parenti, L. Bandini, M. A. Chiacchio, *Bioorg. Med. Chem.* **2013**, *21*, 7929.
